# Supplementary material for: Use of metabolomics data analysis to identify fruit quality markers enhanced by the application of an aminopolysaccharide
Source: Royal Society of Chemistry journal article supplement (doi:10.1039/d1ra05865g), 2021-01-01
Supplement: d1ra05865g1.pdf [file d1ra05865g1.pdf]

**Table S1: Identification of the set of metabolites found in fruits treated with 0.75 mg/ml of chitosan. Treatments having different lowercase letters are significantly different using one-way ANOVA and Duncan test ( $p \leq 0.05$ )**

|                       | Compounds                                                             | Features | MS1 Feature | RT (min) | Ion mode | Monoisotopic mass |          |                                                                 | Fragments (MS/MS)                                                   |                                                                     |                                                                                                                                                                                                                                                                                                                                                                                                                                        | Smiles                                                                                                                                                                                                                                                                                                                                                                                                                                 | InChI                                                                                                                                                                                                                                           | Abundance in fruits from treated plants with chitosan (mg.mL <sup>-1</sup> )                                                                                                                                                                    |          |        |         |         |
|-----------------------|-----------------------------------------------------------------------|----------|-------------|----------|----------|-------------------|----------|-----------------------------------------------------------------|---------------------------------------------------------------------|---------------------------------------------------------------------|----------------------------------------------------------------------------------------------------------------------------------------------------------------------------------------------------------------------------------------------------------------------------------------------------------------------------------------------------------------------------------------------------------------------------------------|----------------------------------------------------------------------------------------------------------------------------------------------------------------------------------------------------------------------------------------------------------------------------------------------------------------------------------------------------------------------------------------------------------------------------------------|-------------------------------------------------------------------------------------------------------------------------------------------------------------------------------------------------------------------------------------------------|-------------------------------------------------------------------------------------------------------------------------------------------------------------------------------------------------------------------------------------------------|----------|--------|---------|---------|
|                       |                                                                       |          |             |          |          | Detected          | Database | Formulae                                                        | Detected                                                            | Database                                                            | Formulae                                                                                                                                                                                                                                                                                                                                                                                                                               |                                                                                                                                                                                                                                                                                                                                                                                                                                        |                                                                                                                                                                                                                                                 | 0                                                                                                                                                                                                                                               | 0.25     | 0.50   | 0.75    | 1       |
|                       |                                                                       |          |             |          |          |                   |          |                                                                 |                                                                     |                                                                     |                                                                                                                                                                                                                                                                                                                                                                                                                                        |                                                                                                                                                                                                                                                                                                                                                                                                                                        |                                                                                                                                                                                                                                                 |                                                                                                                                                                                                                                                 |          |        |         |         |
| Benzenesulfonates     | 4-(3-butylnonyl)-benzenesulfonic acid                                 | 1        | 339.196     | 17.38    | Negative | ***               | 340.2072 | C <sub>19</sub> H <sub>32</sub> O <sub>3</sub> S                | 325.1779<br>220.1476<br>183.0132<br>119.0502<br>79.9586             | 325.1843<br>220.1308<br>183.0132<br>119.0536<br>79.9579             | C <sub>18</sub> H <sub>29</sub> O <sub>3</sub> S <sup>-</sup><br>C <sub>14</sub> H <sub>20</sub> S <sup>4+</sup><br>C <sub>8</sub> H <sub>7</sub> O <sub>3</sub> S <sup>3-</sup><br>C <sub>5</sub> H <sub>11</sub> OS <sup>-</sup><br>O <sub>3</sub> S <sup>2-</sup>                                                                                                                                                                   | OS(C1=CC=C(CCC(CCCCC)CCCC)C=C1)(=O)=O                                                                                                                                                                                                                                                                                                                                                                                                  | -                                                                                                                                                                                                                                               | 7135b                                                                                                                                                                                                                                           | 22006a   | 30186a | 18196ab | 17646ab |
| Benzoates             | Dihydroxyphenyl-5-methyloxazoline-norspermidine-2,3-dihydroxybenzoate | 2        | 487.298     | 16.21    | Positive | ***               | 486.2114 | C <sub>24</sub> H <sub>30</sub> N <sub>4</sub> O <sub>7</sub>   | 486.3007<br>351.2350<br>147.1190<br>133.1300<br>105.1019<br>91.0873 | 486.3043<br>351.2391<br>147.1128<br>133.1335<br>105.1022<br>91.0866 | C <sub>23</sub> H <sub>42</sub> N <sub>4</sub> O <sub>7</sub> <sup>2+</sup><br>C <sub>18</sub> H <sub>31</sub> N <sub>4</sub> O <sub>3</sub> <sup>+</sup><br>C <sub>6</sub> H <sub>13</sub> N <sub>2</sub> O <sub>2</sub> <sup>+</sup><br>C <sub>6</sub> H <sub>17</sub> N <sub>2</sub> O <sup>+</sup><br>C <sub>4</sub> H <sub>13</sub> N <sub>2</sub> O <sup>+</sup><br>C <sub>3</sub> H <sub>11</sub> N <sub>2</sub> O <sup>+</sup> | C[C@H]2(OC(/C1(\C=C/C(/O)=C(/C=1)/O))=N/C2C(=O)NC(CNCCCNC(=O)C3(/C=C/C(C(/O)=3)O)))                                                                                                                                                                                                                                                                                                                                                    | InChI=1S/C24H30N4O7/c1-14-20(28-24(35-14)15-7-8-17(29)19(31)13-15)23(34)27-12-4-10-25-9-3-11-26-22(33)16-5-2-6-18(30)21(16)32/h2,5-8,13-14,20,25,29-32H,3-4,9-12H2,1H3,(H,26,33)(H,27,34)/t14-,20?/m1/s1                                        | 1839b                                                                                                                                                                                                                                           | 2506b    | 3038b  | 5597ab  | 20193a  |
|                       |                                                                       |          | 3           | 488.348  | 16.23    | Positive          | ***      | 486.2114                                                        | C <sub>24</sub> H <sub>30</sub> N <sub>4</sub> O <sub>7</sub>       | 486.3007<br>351.2350<br>147.1190<br>133.1300<br>105.1019<br>91.0873 | 486.3043<br>351.2391<br>147.1128<br>133.1335<br>105.1022<br>91.0866                                                                                                                                                                                                                                                                                                                                                                    | C <sub>23</sub> H <sub>42</sub> N <sub>4</sub> O <sub>7</sub> <sup>2+</sup><br>C <sub>18</sub> H <sub>31</sub> N <sub>4</sub> O <sub>3</sub> <sup>+</sup><br>C <sub>6</sub> H <sub>13</sub> N <sub>2</sub> O <sub>2</sub> <sup>+</sup><br>C <sub>6</sub> H <sub>17</sub> N <sub>2</sub> O <sup>+</sup><br>C <sub>4</sub> H <sub>13</sub> N <sub>2</sub> O <sup>+</sup><br>C <sub>3</sub> H <sub>11</sub> N <sub>2</sub> O <sup>+</sup> | C[C@H]2(OC(/C1(\C=C/C(/O)=C(/C=1)/O))=N/C2C(=O)NC(CNCCCNC(=O)C3(/C=C/C(C(/O)=3)O)))                                                                                                                                                             | InChI=1S/C22H31NO14S2/c1-33-13-9-12(10-14(34-2)18(13)26)6-7-17(25)35-8-4-3-5-16(23-37-39(30,31)32)38-22-21(29)20(28)19(27)15(11-24)36-22/h6-7,9-10,15,19-22,24,26-29H,3-5,8,11H2,1-2H3,(H,30,31,32)/p-1/b7-6+,23-16+/t15-,19-,20+,21-,22+/m1/s1 | 4796b    | 8609ab | 11926a  | 9638ab  |
| Desulfoglucosinolates | 4-sinapoyloxybutylglucosinolate                                       | 4        | 597.175     | 5.43     | Negative | ***               | 597.1186 | C <sub>22</sub> H <sub>31</sub> NO <sub>14</sub> S <sub>2</sub> | 477.1587<br>255.0308<br>119.0383                                    | 477.1502<br>255.0246<br>119.0405                                    | C <sub>20</sub> H <sub>31</sub> NO <sub>8</sub> S <sub>2</sub> <sup>2-</sup><br>C <sub>7</sub> H <sub>13</sub> NO <sub>3</sub> S <sub>2</sub> <sup>2-</sup><br>C <sub>4</sub> H <sub>9</sub> NOS                                                                                                                                                                                                                                       | COC2(/C=C(/C=C/C(OCCCC)/S[C@@H]1(O[C@H](CO)[C@@H](O)[C@H](O)[C@@H](O)1))=N\OS(=O)=O)[O-])=O)/C=C(C(O)=2)/OC                                                                                                                                                                                                                                                                                                                            | InChI=1S/C22H31NO14S2/c1-33-13-9-12(10-14(34-2)18(13)26)6-7-17(25)35-8-4-3-5-16(23-37-39(30,31)32)38-22-21(29)20(28)19(27)15(11-24)36-22/h6-7,9-10,15,19-22,24,26-29H,3-5,8,11H2,1-2H3,(H,30,31,32)/p-1/b7-6+,23-16+/t15-,19-,20+,21-,22+/m1/s1 | 23263c                                                                                                                                                                                                                                          | 26701c   | 50648b | 87047a  | 42042b  |
|                       | 5-(methylsulfanyl)pentyl-desulfoglucosinolate (I & II) derivative     | 5        | 515.111     | 5.79     | Negative | ***               | ***      | ***                                                             | 293.1068<br>179.0370<br>173.0463                                    | 293.1130<br>179.0450<br>173.0521                                    | C <sub>12</sub> H <sub>23</sub> NO <sub>3</sub> S <sub>2</sub> <sup>2-</sup><br>C <sub>6</sub> H <sub>13</sub> NOS <sub>2</sub> <sup>3-</sup><br>C <sub>7</sub> H <sub>11</sub> NO <sub>2</sub> S <sup>2-</sup>                                                                                                                                                                                                                        | CSCCCCCC/S[C@@H]1(O[C@H](CO)[C@@H](O)[C@H](O)[C@@H](O)1))=NO                                                                                                                                                                                                                                                                                                                                                                           | InChI=1S/C13H25NO6S2/c1-21-6-4-2-3-5-9(14-19)22-13-12(18)11(17)10(16)8(7-15)20-13/h8,10-13,15-19H,2-7H2,1H3/b14-9+/t8-,10-,11+,12-,13+/m1/s1                                                                                                    | 4169c                                                                                                                                                                                                                                           | 12016abc | 22147a | 16387ab | 7743bc  |

|                  |                                              |                                               |         |          |          |          |          |                                                |                                                              |                                                             |                                                                                                                                                                              |                                                                                                                                                                                                                                                       |                                                                                                                             |                                                                                                                                                                                                    |         |         |         |         |        |
|------------------|----------------------------------------------|-----------------------------------------------|---------|----------|----------|----------|----------|------------------------------------------------|--------------------------------------------------------------|-------------------------------------------------------------|------------------------------------------------------------------------------------------------------------------------------------------------------------------------------|-------------------------------------------------------------------------------------------------------------------------------------------------------------------------------------------------------------------------------------------------------|-----------------------------------------------------------------------------------------------------------------------------|----------------------------------------------------------------------------------------------------------------------------------------------------------------------------------------------------|---------|---------|---------|---------|--------|
| Phenylpropanoids | 1-(3,4-dihydroxyphenyl)-5-hydroxy-3-decanone | 6                                             | 280.184 | 8.7      | Positive | ***      | 280.1675 | C <sub>16</sub> H <sub>24</sub> O <sub>4</sub> | 172.1449<br>116.0783<br>108.0507                             | 172.1452<br>116.0826<br>108.0564                            | C <sub>10</sub> H <sub>20</sub> O <sub>2</sub> <sup>2+</sup><br>C <sub>6</sub> H <sub>12</sub> O <sub>2</sub> <sup>2+</sup><br>C <sub>7</sub> H <sub>8</sub> O <sup>2+</sup> | CCCCC[C@H](O)C<br>C(=O)CCCC(C=C(C<br>C(O)=C=C=1)O)                                                                                                                                                                                                    | InChI=1S/C16H24O4/c1-2-3-4-5-13(17)11-14(18)8-6-12-7-9-15(19)16(20)10-12/h7,9-10,13,17,19-20H,2-6,8,11H2,1H3/t13-/m0/s1     | 34025b                                                                                                                                                                                             | 39727ab | 45349ab | 57783a  | 56184a  |        |
| Fatty acids      | Linolenate conjugated                        | 7                                             | 325.236 | 17.43    | Negative | ***      | ***      | ***                                            | 279.2312                                                     | 279.2330                                                    | C <sub>18</sub> H <sub>31</sub> O <sub>2</sub> <sup>-</sup>                                                                                                                  | CC\C=C/C\C=C/C\C=C/C<br>=C/CCCCCCCC(=O<br>)a glycerolipid]                                                                                                                                                                                            | -                                                                                                                           | 5196ab                                                                                                                                                                                             | 5622ab  | 4588b   | 8509a   | 5847ab  |        |
|                  |                                              | 8                                             | 447.244 | 16.39    | Negative | ***      | ***      | ***                                            | 279.2312                                                     | 279.2330                                                    | C <sub>18</sub> H <sub>31</sub> O <sub>2</sub> <sup>-</sup>                                                                                                                  |                                                                                                                                                                                                                                                       |                                                                                                                             | 3068b                                                                                                                                                                                              | 9001ab  | 12803a  | 15119a  | 6521ab  |        |
|                  |                                              | 9                                             | 463.285 | 15.06    | Negative | ***      | ***      | ***                                            | 279.2312<br>255.2312                                         | 279.2330<br>255.233                                         | C <sub>18</sub> H <sub>31</sub> O <sub>2</sub> <sup>-</sup><br>C <sub>16</sub> H <sub>31</sub> O <sub>2</sub> <sup>-</sup>                                                   |                                                                                                                                                                                                                                                       |                                                                                                                             | 13514c                                                                                                                                                                                             | 21482bc | 28089b  | 54438a  | 20630bc |        |
|                  |                                              | 10                                            | 487.286 | 14.24    | Negative | ***      | ***      | ***                                            | 279.2312                                                     | 279.2330                                                    | C <sub>18</sub> H <sub>31</sub> O <sub>2</sub> <sup>-</sup>                                                                                                                  |                                                                                                                                                                                                                                                       |                                                                                                                             | 7810b                                                                                                                                                                                              | 16461b  | 11777b  | 30702a  | 11314b  |        |
|                  |                                              | 11                                            | 559.306 | 12.75    | Negative | ***      | ***      | ***                                            | 277.2151                                                     | 277.2173                                                    | C <sub>18</sub> H <sub>29</sub> O <sub>2</sub> <sup>-</sup>                                                                                                                  |                                                                                                                                                                                                                                                       |                                                                                                                             | 57614b                                                                                                                                                                                             | 49322b  | 169901a | 132406a | 54561b  |        |
|                  |                                              | 12                                            | 561.322 | 13.41    | Negative | ***      | ***      | ***                                            | 279.2312                                                     | 279.2330                                                    | C <sub>18</sub> H <sub>31</sub> O <sub>2</sub> <sup>-</sup>                                                                                                                  |                                                                                                                                                                                                                                                       |                                                                                                                             | 12810bc                                                                                                                                                                                            | 33029ab | 32821ab | 44741a  | 8618c   |        |
|                  |                                              | 13                                            | 562.307 | 11.76    | Negative | ***      | ***      | ***                                            | 279.2312                                                     | 279.2330                                                    | C <sub>18</sub> H <sub>31</sub> O <sub>2</sub> <sup>-</sup>                                                                                                                  |                                                                                                                                                                                                                                                       |                                                                                                                             | 23339a                                                                                                                                                                                             | 18663a  | 66075a  | 71246a  | 72596a  |        |
|                  |                                              | 14                                            | 564.324 | 12.28    | Negative | ***      | ***      | ***                                            | 277.2151                                                     | 277.2173                                                    | C <sub>18</sub> H <sub>29</sub> O <sub>2</sub> <sup>-</sup>                                                                                                                  |                                                                                                                                                                                                                                                       |                                                                                                                             | 75115b                                                                                                                                                                                             | 71852b  | 50183b  | 127415a | 63186b  |        |
|                  |                                              | 15                                            | 563.336 | 14.77    | Negative | ***      | ***      | ***                                            | 277.2151                                                     | 277.2173                                                    | C <sub>18</sub> H <sub>29</sub> O <sub>2</sub> <sup>-</sup>                                                                                                                  |                                                                                                                                                                                                                                                       |                                                                                                                             | 6570ab                                                                                                                                                                                             | 12189a  | 7841ab  | 10895a  | 3274b   |        |
|                  | 16                                           | 721.354                                       | 11.34   | Negative | ***      | ***      | ***      | 277.2151                                       | 277.2173                                                     | C <sub>18</sub> H <sub>29</sub> O <sub>2</sub> <sup>-</sup> | 7180b                                                                                                                                                                        | 4953b                                                                                                                                                                                                                                                 | 14125a                                                                                                                      | 12677a                                                                                                                                                                                             | 6159b   |         |         |         |        |
|                  | 17                                           | 723.371                                       | 12.07   | Negative | ***      | ***      | ***      | 279.2312                                       | 279.2330                                                     | C <sub>16</sub> H <sub>31</sub> O <sub>2</sub> <sup>-</sup> | 3994b                                                                                                                                                                        | 11723a                                                                                                                                                                                                                                                | 13222a                                                                                                                      | 15189a                                                                                                                                                                                             | 3043b   |         |         |         |        |
|                  |                                              | 12-oxo-9-hydroxy-10[E],15(Z)-octadecadienoate | 18      | 311.213  | 16.92    | Positive | ***      | 310.2144                                       | C <sub>18</sub> H <sub>30</sub> O <sub>4</sub>               | 203.2080<br>177.1528<br>105.0926<br>77.0551                 | 203.2006<br>177.1485<br>105.0910<br>77.0597                                                                                                                                  | C <sub>12</sub> H <sub>27</sub> O <sub>2</sub> <sup>+</sup><br>C <sub>9</sub> H <sub>21</sub> O <sub>3</sub> <sup>+</sup><br>C <sub>3</sub> H <sub>13</sub> O <sub>2</sub> <sup>+</sup><br>C <sub>3</sub> H <sub>9</sub> O <sub>2</sub> <sup>+</sup>  | CC\C=C/CCC(=O)/<br>C=C/C(O)CCCCC<br>CC(=O)[O-]                                                                              | InChI=1S/C18H30O4/c1-2-3-4-8-11-16(19)14-15-17(20)12-9-6-5-7-10-13-18(21)22/h3-4,14-15,17,20H,2,5-13H2,1H3,(H,21,22)/p-1/b4-3-,15-14+                                                              | 21169a  | 20147a  | 22425a  | 32376a  | 28937a |
|                  |                                              | 2-oxo-behenate                                | 19      | 355.339  | 12.31    | Positive | ***      | 354.3134                                       | C <sub>22</sub> H <sub>42</sub> O <sub>3</sub>               | 183.1714<br>172.1724                                        | 183.1743<br>172.1816                                                                                                                                                         | C <sub>12</sub> H <sub>23</sub> O <sup>+</sup><br>C <sub>11</sub> H <sub>24</sub> O <sup>2+</sup>                                                                                                                                                     | C(CCCCCCCCCC<br>CCCCCCCCC(O-<br>))=O=O                                                                                      | InChI=1S/C22H42O3/c23-21-19-17-15-13-11-9-7-5-3-1-2-4-6-8-10-12-14-16-18-20-22(24)25/h21H,1-20H2,(H,24,25)/p-1                                                                                     | 3620ab  | 5299ab  | 4757ab  | 7179a   | 1860b  |
|                  |                                              | 2-undecanone                                  | 20      | 171.169  | 15.90    | Positive | ***      | 170.1671                                       | C <sub>11</sub> H <sub>22</sub> O <sup>+</sup>               | 171.1665<br>101.0889<br>73.0470                             | 171.1743<br>101.0961<br>73.0648                                                                                                                                              | C <sub>11</sub> H <sub>23</sub> O <sup>+</sup><br>C <sub>6</sub> H <sub>13</sub> O <sup>+</sup><br>C <sub>4</sub> H <sub>9</sub> O <sup>+</sup>                                                                                                       | CCCCCCCCC(=O<br>)C                                                                                                          | InChI=1S/C11H22O/c1-3-4-5-6-7-8-9-10-11(2)12/h3-10H2,1-2H3                                                                                                                                         | 2533a   | 2978a   | 3066a   | 2711a   | 2596a  |
|                  |                                              | Derivative                                    | 21      | 289.283  | 15.90    | Positive | ***      | ***                                            | ***                                                          | 172.1724<br>171.1665                                        | 172.1816<br>171.1743                                                                                                                                                         | C <sub>11</sub> H <sub>24</sub> O <sup>2+</sup><br>C <sub>11</sub> H <sub>23</sub> O <sup>+</sup>                                                                                                                                                     | -                                                                                                                           | -                                                                                                                                                                                                  | 2653b   | 2901b   | 119097a | 2924b   | 2592b  |
|                  | Flavonoids                                   | Anthocyanins<br>Cyanidin-3-O-β-D-glucoside    | 22      | 449.106  | 5.39     | Negative | ***      | 449.1078                                       | C <sub>21</sub> H <sub>21</sub> O <sub>11</sub> <sup>+</sup> | 449.1079<br>269.1109<br>135.0451<br>101.0393                | 449.1087<br>269.1183<br>135.0452<br>101.0608                                                                                                                                 | C <sub>21</sub> H <sub>21</sub> O <sub>11</sub> <sup>+</sup><br>C <sub>17</sub> H <sub>17</sub> O <sub>3</sub> <sup>-</sup><br>C <sub>8</sub> H <sub>7</sub> O <sub>2</sub> <sup>-</sup><br>C <sub>5</sub> H <sub>9</sub> O <sub>2</sub> <sup>-</sup> | C(O)[C@@H]1([C@@H](O)[C@H](O)<br>][C@@H](O)[C@@H](O)<br>H](O)OC3(C(C2(C=C(C(O)=C=C=2)<br>O))=[O+])C4(C(C=3)=C(C=C=4)/[O-])) | InChI=1S/C21H20O11/c2-7-16-17(27)18(28)19(29)21(32)-16)31-15-6-10-12(25)4-9(23)5-14(10)30-20(15)8-1-2-11(24)13(26)3-8/h1-6,16-19,21-22,27-29H,7H2,(H3-,23,24,25,26)/p-1/t16-,17-,18+,19-,21-/m1/s1 | 18926a  | 29479a  | 11112a  | 34816a  | 7055a  |
|                  |                                              | Cyanidin-3-O-β-D-                             |         |          |          |          |          |                                                |                                                              |                                                             |                                                                                                                                                                              |                                                                                                                                                                                                                                                       | C(O)[C@@H]1([C@@H](O)[C@H](O)<br>][C@@H](O)[C@@H](O)<br>][C@@H](O)[C@@H](O)                                                 | InChI=1S/C21H20O11/c2-7-16-17(27)18(28)19(29)21(32)                                                                                                                                                |         |         |         |         |        |

|                                                |    |         |      |          |     |          |                                                              |                                              |                                              |                                                                                                                                                                                                                  |                                                                                                                    |                                                                                                                                                                                                  |        |        |        |        |       |  |
|------------------------------------------------|----|---------|------|----------|-----|----------|--------------------------------------------------------------|----------------------------------------------|----------------------------------------------|------------------------------------------------------------------------------------------------------------------------------------------------------------------------------------------------------------------|--------------------------------------------------------------------------------------------------------------------|--------------------------------------------------------------------------------------------------------------------------------------------------------------------------------------------------|--------|--------|--------|--------|-------|--|
| glucopyrano-<br>side                           |    |         |      |          |     |          |                                                              |                                              |                                              |                                                                                                                                                                                                                  | H](O1)OC3(\C(C2(\C=C(C(O)=C\C=2)\O))=[O+]C4(\C/C=3)=C/C=C(C=4)[O-])\O-))                                           | -16)31-15-6-10-12(25)4-9(23)5-14(10)30-20(15)8-1-2-11(24)13(26)3-8/h1-6,16-19,21-22,27-29H,7H2,(H3-23,24,25,26)/p-1/t16-,17-,18+,19-,21-/m1/s1                                                   |        |        |        |        |       |  |
| Cyanidin-5-O-β-D-glucoside                     |    |         |      |          |     |          |                                                              |                                              |                                              |                                                                                                                                                                                                                  | C(O)[C@@H]1([C@@H](O)[C@H](O)[C@@H](O)[C@@H](O1)OC3(\C4(C=C(C(C2(\C=C(C(O)=C\C=2)\O))=[O+]C(\C=C(=3)[O-])=4)[O-])) | InChI=1S/C21H20O11/c2-7-16-17(27)18(28)19(29)21(32-16)31-15-5-9(23)4-14-10(15)6-13(26)20(30-14)8-1-2-11(24)12(25)3-8/h1-6,16-19,21-22,27-29H,7H2,(H3-23,24,25,26)/p-1/t16-,17-,18+,19-,21-/m1/s1 |        |        |        |        |       |  |
| Cyanidin-3-O-β-D-galactoside                   |    |         |      |          |     |          |                                                              |                                              |                                              |                                                                                                                                                                                                                  | C(O)[C@@H]1([C@@H](O)[C@H](O)[C@@H](O)[C@@H](O1)OC3(\C(C2(\C=C(C(O)=C\C=2)\O))=[O+]C(\C=C(=3)[O-])=4)[O-]))        | InChI=1S/C21H20O11/c2-7-16-17(27)18(28)19(29)21(32-16)31-15-6-10-12(25)4-9(23)5-14(10)30-20(15)8-1-2-11(24)13(26)3-8/h1-6,16-19,21-22,27-29H,7H2,(H3-23,24,25,26)/t16-,17+,18+,19-,21-/m1/s1     |        |        |        |        |       |  |
| Anthocyanins<br>Pelargonidin-3-O-β-D-glucoside |    |         |      |          |     |          |                                                              |                                              |                                              |                                                                                                                                                                                                                  | C(O)[C@H]1(O[C@@H]([C@@H]([C@@H](O)O)OC2(\C(=[O+]C3(\C=C(C(C(\C=2)=3)[O-]))O))C4(\C=C(C(O)=C\C=4)))                | InChI=1S/C21H20O10/c2-8-16-17(26)18(27)19(28)21(31-16)30-15-7-12-13(25)5-11(24)6-14(12)29-20(15)9-1-3-10(23)4-2-9/h1-7,16-19,21-22,26-28H,8H2,(H2-23,24,25)/t16-,17-,18+,19-,21-/m1/s1           |        |        |        |        |       |  |
| Luteolinidin-3-O-β-D-glucoside                 | 23 | 433.110 | 5.26 | Negative | *** | 433.1129 | C <sub>21</sub> H <sub>21</sub> O <sub>10</sub> <sup>+</sup> | 433.1125<br>282.1098<br>271.0600<br>119.0502 | 433.1140<br>282.1103<br>271.0612<br>119.0502 | C <sub>21</sub> H <sub>21</sub> O <sub>10</sub> <sup>-</sup><br>C <sub>14</sub> H <sub>18</sub> O <sub>6</sub><br>C <sub>15</sub> H <sub>11</sub> O <sub>5</sub><br>C <sub>8</sub> H <sub>7</sub> O <sup>-</sup> | C1=CC(=C(C=C1C2=[O+]C3=C(C=C2)C(=CC(=C3)O)OC4(C(C(C(O4)CO)O)O)O                                                    | InChI=1S/C21H20O10/c2-8-17-18(26)19(27)20(28)21(31-17)30-16-7-10(23)6-15-11(16)2-4-14(29-15)9-1-3-12(24)13(25)5-9/h1-7,17-22,26-28H,8H2,(H2-23,24,25)/p+1/t17-,18-,19+,20-,21-/m1/s1             | 5115bc | 8541ab | 4182bc | 11076a | 2627c |  |
| Cyanidin-3-O-rhamnoside                        |    |         |      |          |     |          |                                                              |                                              |                                              |                                                                                                                                                                                                                  | C[C@@H]1O[C@@H](OC2=C([O+]=C3C=C(O)C=C(O)C3=C2)C2=CC(O)=C                                                          | InChI=1S/C21H20O10/c1-8-17(26)18(27)19(28)21(29-8)31-16-7-11-13(24)5-10(22)6-15(11)30-                                                                                                           |        |        |        |        |       |  |

|                                                  |    |         |      |          |          |          |                                                              |                                 |                                 |                                                                                                                                                             |                                                                                                                                                  |                                                                                                                                                                                                                                                                                  |        |         |        |        |       |  |
|--------------------------------------------------|----|---------|------|----------|----------|----------|--------------------------------------------------------------|---------------------------------|---------------------------------|-------------------------------------------------------------------------------------------------------------------------------------------------------------|--------------------------------------------------------------------------------------------------------------------------------------------------|----------------------------------------------------------------------------------------------------------------------------------------------------------------------------------------------------------------------------------------------------------------------------------|--------|---------|--------|--------|-------|--|
| Peonidin-3-O- $\alpha$ -D-arabinopyranoside      |    |         |      |          |          |          |                                                              |                                 |                                 |                                                                                                                                                             | (O)C=C2][C@H](O)[C@H](O)[C@H]1O<br><br>COc(c(O)4)cc(cc4)c([o+1])c(OC(O3)C(O)C(O)C(O)3)cc(c(O)2)c(cc(O)c2)1                                       | 20(16)9-2-3-12(23)14(25)4-9/h2-8,17-19,21,26-28H,1H3,(H3-22,23,24,25)/p+1/t8-,17-,18+,19+,21-/m0/s1<br><br>InChI=1S/C21H20O10/c1-28-16-4-9(2-3-12(16)23)20-17(31-21-19(27)18(26)14(25)8-29-21)7-11-13(24)5-10(22)6-15(11)30-20/h2-7,14,18-19,21,25-27H,8H2,1H3,(H2-22,23,24)/p+1 |        |         |        |        |       |  |
| Derivative of malvidin-3-O- $\beta$ -D-glucoside | 24 | 475.120 | 6.4  | Negative | ***      | 475.1246 | C <sub>23</sub> H <sub>23</sub> O <sub>11</sub> <sup>-</sup> | 271.0600<br>119.0502<br>43.0667 | 271.0823<br>119.0502<br>43.0189 | C <sub>12</sub> H <sub>15</sub> O <sub>7</sub> <sup>-</sup><br>C <sub>8</sub> H <sub>7</sub> O <sup>-</sup><br>C <sub>2</sub> H <sub>3</sub> O <sup>-</sup> | COC1(/C=C(/C=C(C(O)=1)/OC)/C3(C/O[C@H]2([C@H](O)[C@@H](O)[C@H](O)[C@@H](CO)O2))=C/C4(C(C(O)=C/C(O)=C/C(\O+)=3)=4)))                              | InChI=1S/C23H24O12/c1-31-14-3-9(4-15(32-2)18(14)27)22-16(7-11-12(26)5-10(25)6-13(11)33-22)34-23-21(30)20(29)19(28)17(8-24)35-23/h3-7,17,19-21,23-24,28-30H,8H2,1-2H3,(H2-25,26,27)/t17-,19-,20+,21-,23-/m1/s1                                                                    | 7912ab | 10263ab | 6502ab | 25525a | 3287b |  |
| Rutin                                            | 25 | 609.139 | 4.72 | Negative | 610.1572 | 610.1534 | C <sub>27</sub> H <sub>30</sub> O <sub>16</sub>              | 301.0327<br>337.1068            | 301.0357<br>337.0929            | C <sub>15</sub> H <sub>9</sub> O <sub>7</sub> <sup>-</sup><br>C <sub>16</sub> H <sub>17</sub> O <sub>8</sub> <sup>-</sup>                                   | C[C@H]1([C@H](O)[C@@H](O)[C@@H](O1)OC[C@H]2([C@H](O)[C@H](O)[C@@H](O)[C@@H](O2)OC4(C(=O)C5(/C(O)=C/C(O)=C/C(O)C3(/C=C(C(O)=C/C(O)=C3)O))=4)=5))) | InChI=1S/C27H30O16/c1-8-17(32)20(35)22(37)26(40-8)39-7-15-18(33)21(36)23(38)27(42-15)43-25-19(34)16-13(31)5-10(28)6-14(16)41-24(25)9-2-3-11(29)12(30)4-9/h2-6,8,15,17-18,20-23,26-33,35-38H,7H2,1H3/t8-,15+,17-,18+,20+,21-,22+,23+,26+,27-/m0/s1                                | 8856a  | 5131a   | 7060a  | 12720a | 6178a |  |
| Datiscin                                         | 26 | 593.143 | 5.6  | Negative | ***      | 594.1585 | C <sub>27</sub> H <sub>30</sub> O <sub>15</sub>              | 285.0363<br>284.0271            | 285.0405<br>284.0332            | C <sub>15</sub> H <sub>9</sub> O <sub>6</sub> <sup>-</sup><br>C <sub>15</sub> H <sub>8</sub> O <sub>6</sub> <sup>2-</sup>                                   | CC1C(C(C(C(O1)OCC2C(C(C(C(O2)O)C3=C(OC4=CC(=C(C=C4C3=O)O)O)C5=CC=CC=C5O)O)O)O)O)O                                                                | InChI=1S/C27H30O15/c1-9-17(31)20(34)22(36)26(39-9)38-8-15-18(32)21(35)23(37)27(41-15)42-25-19(33)16-13(30)6-10(28)7-14(16)40-24(25)11-4-2-3-5-12(11)29/h2-7,9,15,17-18,20-23,26-32,34-37H,8H2,1H3/t9-,15+,17-,18+,20+,21-,22+,23+,26+,27-/m0/s1                                  | 12415a | 10612a  | 7922a  | 17802a | 8287a |  |
| Kaempferol-3-O-                                  |    |         |      |          |          |          |                                                              |                                 |                                 |                                                                                                                                                             | C[C@@H]5(O[C@@H](OC[C@H]4(O[C@@H](OC2(C(C3                                                                                                       | InChI=1S/C27H30O15/c1-9-17(31)20(34)22(36)26(39-9)38-8-15-                                                                                                                                                                                                                       |        |         |        |        |       |  |



|                               |  |  |  |  |  |  |  |  |  |  |                                                 |                                                                                                                                                                                                                                                                                                                                                                                                                                                                                                                                                                                                                                                                                             |
|-------------------------------|--|--|--|--|--|--|--|--|--|--|-------------------------------------------------|---------------------------------------------------------------------------------------------------------------------------------------------------------------------------------------------------------------------------------------------------------------------------------------------------------------------------------------------------------------------------------------------------------------------------------------------------------------------------------------------------------------------------------------------------------------------------------------------------------------------------------------------------------------------------------------------|
| Luteolin 7-o-neohesperidoside |  |  |  |  |  |  |  |  |  |  | <chem>O=C1C=CC(=O)OC1C(=O)OC2=CC(=O)C=C2</chem> | <p>23(36)21(34)18(8-28)41-27(25)39-11-5-14(31)19-15(32)7-16(40-17(19)6-11)10-2-3-12(29)13(30)4-10/h2-7,9,18,20-31,33-37H,8H2,1H3/9-,18+,20-,21+,22+,23-,24+,25+,26-,27+/m0/s1</p> <p>InChI=1S/C27H30O15/c28-8-17-20(32)22(34)24(36)26(41-17)38-9-18-21(33)23(35)25(37)27(42-18)39-12-5-13(30)19-14(31)7-15(40-16(19)6-12)10-1-3-11(29)4-2-10/h1-7,17-18,20-30,32-37H,8-9H2/t17-,18-,20-,21-,22+,23+,24-,25-,26-,27-/m1/s1</p> <p>InChI=1S/C27H30O15/c28-7-15-20(34)23(37)26(42-27-24(38)22(36)19(33)16(8-29)41-27)25(40-15)18-12(32)6-14-17(21(18)35)11(31)5-13(39-14)9-1-3-10(30)4-2-9/h1-6,15-16,19-20,22-30,32-38H,7-8H2/p-1/t15-,16-,19-,20-,22+,23+,24-,25+,26-,27+/m1/s1</p>          |
| Apigenin-7-ogentiobioside     |  |  |  |  |  |  |  |  |  |  | <chem>O=C1C=CC(=O)OC1C(=O)OC2=CC(=O)C=C2</chem> | <p>23(36)21(34)18(8-28)41-27(25)39-11-5-14(31)19-15(32)7-16(40-17(19)6-11)10-2-3-12(29)13(30)4-10/h2-7,9,18,20-31,33-37H,8H2,1H3/9-,18+,20-,21+,22+,23-,24+,25+,26-,27+/m0/s1</p> <p>InChI=1S/C27H30O15/c28-8-17-20(32)22(34)24(36)26(41-17)38-9-18-21(33)23(35)25(37)27(42-18)39-12-5-13(30)19-14(31)7-15(40-16(19)6-12)10-1-3-11(29)4-2-10/h1-7,17-18,20-30,32-37H,8-9H2/t17-,18-,20-,21-,22+,23+,24-,25-,26-,27-/m1/s1</p> <p>InChI=1S/C27H30O15/c28-7-15-20(34)23(37)26(42-27-24(38)22(36)19(33)16(8-29)41-27)25(40-15)18-12(32)6-14-17(21(18)35)11(31)5-13(39-14)9-1-3-10(30)4-2-9/h1-6,15-16,19-20,22-30,32-38H,7-8H2/p-1/t15-,16-,19-,20-,22+,23+,24-,25+,26-,27+/m1/s1</p>          |
| Isovitexin 2-O-β-D-glucoside  |  |  |  |  |  |  |  |  |  |  | <chem>O=C1C=CC(=O)OC1C(=O)OC2=CC(=O)C=C2</chem> | <p>23(36)21(34)18(8-28)41-27(25)39-11-5-14(31)19-15(32)7-16(40-17(19)6-11)10-2-3-12(29)13(30)4-10/h2-7,9,18,20-31,33-37H,8H2,1H3/9-,18+,20-,21+,22+,23-,24+,25+,26-,27+/m0/s1</p> <p>InChI=1S/C27H30O15/c28-7-15-20(34)23(37)26(42-27-24(38)22(36)19(33)16(8-29)41-27)25(40-15)18-12(32)6-14-17(21(18)35)11(31)5-13(39-14)9-1-3-10(30)4-2-9/h1-6,15-16,19-20,22-30,32-38H,7-8H2/p-1/t15-,16-,19-,20-,22+,23+,24-,25+,26-,27+/m1/s1</p> <p>InChI=1S/C27H30O15/c28-7-15-20(34)23(37)26(42-27-24(38)22(36)19(33)16(8-29)41-27)25(40-15)18-12(32)6-14-17(21(18)35)11(31)5-13(39-14)9-1-3-10(30)4-2-9/h1-6,15-16,19-20,22-30,32-38H,7-8H2/p-1/t15-,16-,19-,20-,22+,23+,24-,25+,26-,27+/m1/s1</p> |
| Isovitexin 7-ogalactoside     |  |  |  |  |  |  |  |  |  |  | <chem>O=C1C=CC(=O)OC1C(=O)OC2=CC(=O)C=C2</chem> | <p>23(36)21(34)18(8-28)41-27(25)39-11-5-14(31)19-15(32)7-16(40-17(19)6-11)10-2-3-12(29)13(30)4-10/h2-7,9,18,20-31,33-37H,8H2,1H3/9-,18+,20-,21+,22+,23-,24+,25+,26-,27+/m0/s1</p> <p>InChI=1S/C27H30O15/c28-7-15-20(34)23(37)26(42-27-24(38)22(36)19(33)16(8-29)41-27)25(40-15)18-12(32)6-14-17(21(18)35)11(31)5-13(39-14)9-1-3-10(30)4-2-9/h1-6,15-16,19-20,22-30,32-38H,7-8H2/p-1/t15-,16-,19-,20-,22+,23+,24-,25+,26-,27+/m1/s1</p> <p>InChI=1S/C27H30O15/c28-7-15-20(34)23(37)26(42-27-24(38)22(36)19(33)16(8-29)41-27)25(40-15)18-12(32)6-14-17(21(18)35)11(31)5-13(39-14)9-1-3-10(30)4-2-9/h1-6,15-16,19-20,22-30,32-38H,7-8H2/p-1/t15-,16-,19-,20-,22+,23+,24-,25+,26-,27+/m1/s1</p> |
| Isovitexin 7-O-glucoside      |  |  |  |  |  |  |  |  |  |  | <chem>O=C1C=CC(=O)OC1C(=O)OC2=CC(=O)C=C2</chem> | <p>23(36)21(34)18(8-28)41-27(25)39-11-5-14(31)19-15(32)7-16(40-17(19)6-11)10-2-3-12(29)13(30)4-10/h2-7,9,18,20-31,33-37H,8H2,1H3/9-,18+,20-,21+,22+,23-,24+,25+,26-,27+/m0/s1</p> <p>InChI=1S/C27H30O15/c28-7-15-20(34)23(37)26(42-27-24(38)22(36)19(33)16(8-29)41-27)25(40-15)18-12(32)6-14-17(21(18)35)11(31)5-13(39-14)9-1-3-10(30)4-2-9/h1-6,15-16,19-20,22-30,32-38H,7-8H2/p-1/t15-,16-,19-,20-,22+,23+,24-,25+,26-,27+/m1/s1</p> <p>InChI=1S/C27H30O15/c28-7-15-20(34)23(37)26(42-27-24(38)22(36)19(33)16(8-29)41-27)25(40-15)18-12(32)6-14-17(21(18)35)11(31)5-13(39-14)9-1-3-10(30)4-2-9/h1-6,15-16,19-20,22-30,32-38H,7-8H2/p-1/t15-,16-,19-,20-,22+,23+,24-,25+,26-,27+/m1/s1</p> |

|            |                           |    |         |       |          |     |         |                                                |          |          |                                                                                                                                                                                                                                                          |                                                                                                                                                                                                                                                                                                                                                                                        |                                                                                                                                                                      |       |        |        |         |        |  |  |  |  |  |  |  |
|------------|---------------------------|----|---------|-------|----------|-----|---------|------------------------------------------------|----------|----------|----------------------------------------------------------------------------------------------------------------------------------------------------------------------------------------------------------------------------------------------------------|----------------------------------------------------------------------------------------------------------------------------------------------------------------------------------------------------------------------------------------------------------------------------------------------------------------------------------------------------------------------------------------|----------------------------------------------------------------------------------------------------------------------------------------------------------------------|-------|--------|--------|---------|--------|--|--|--|--|--|--|--|
|            | Rhamnosylisoorientin      |    |         |       |          |     |         |                                                |          |          | <chem>C@@H](O2)=C(/C=3)/O[C@@H]4(O[C@H](CO)[C@@H](O)[C@H](O)[C@@H](O4))O))=5)O)</chem><br><chem>C[C@H]1([C@H](O)[C@@H](O)[C@@H](O)C(O1)O[C@H]5([C@H](C3(/C(/[O-])=C\C4(OC/C2(C=C(C(O)=C\C=2).O))=C/C(C(O)=3)=4)=O))O[C@H](CO)[C@@H](O)[C@H](O)5))</chem> | <p>12(39-13)9-1-3-10(30)4-2-9/h1-6,15-16,19-20,22-30,32-38H,7-8H2/t15-,16-,19-,20-,22+,23+,24-,25-,26+,27-/m1/s1</p> <p>InChI=1S/C27H30O15/e1-8-</p> <p>19(33)22(36)24(38)27(39-8)42-26-</p> <p>23(37)20(34)16(7-28)41-25(26)18-13(32)6-15-17(21(18)35)12(31)5-14(40-15)9-2-3-10(29)11(30)4-9/h2-6,8,16,19-20,22-30,32-38H,7H2,1H3/p-1/8-,16+,19-,20+,22+,23-,24+,25-,26+,27/m0/s1</p> |                                                                                                                                                                      |       |        |        |         |        |  |  |  |  |  |  |  |
|            | Vitexin 2-O-β-D-glucoside |    |         |       |          |     |         |                                                |          |          | <chem>C([C@@H]4([C@H]([C@@H]([C@H]([C@H](C2(/C3(/OC/C1(C=C/C(O)=C\C=1))=C/C(C(O)=C\C(C(O-))=2)=3)=O))O4)O[C@H]5([C@@H]([C@H]([C@H]([C@H](O5)CO)O)O))O))O</chem>                                                                                          | <p>InChI=1S/C27H30O15/e28-7-15-</p> <p>20(35)22(37)26(42-27-23(38)21(36)19(34)16(8-29)41-27)25(40-15)18-12(32)5-11(31)17-13(33)6-14(39-24(17)18)9-1-3-10(30)4-2-9/h1-6,15-16,19-23,25-32,34-38H,7-8H2/p-1/t15-,16-,19-,20-,21+,22+,23-,25+,26-,27+/m1/s1</p>                                                                                                                           |                                                                                                                                                                      |       |        |        |         |        |  |  |  |  |  |  |  |
|            | Vicenin-2                 |    |         |       |          |     |         |                                                |          |          | <chem>C(O)[C@@H]5([C@@H](O)[C@H](O)[C@@H](O)[C@H](C3(/C(/[O-])=C([C@@H]1(O)[C@H](CO)[C@@H](O)[C@H](O)[C@H](O)1))C4(OC(C2(C=C(C(O)=C\C(O)=3)=4))O5)</chem>                                                                                                | <p>InChI=1S/C27H30O15/e28-6-12-</p> <p>17(32)21(36)23(38)26(41-12)15-19(34)14-10(31)5-11(8-1-3-9(30)4-2-8)40-25(14)16(20(15)35)27-24(39)22(37)18(33)13(7-29)42-27/h1-5,12-13,17-18,21-24,26-30,32-39H,6-7H2/p-1/t12-,13-,17-,18-,21+,22+,23-,24-,26+,27+/m1/s1</p>                                                                                                                     |                                                                                                                                                                      |       |        |        |         |        |  |  |  |  |  |  |  |
| Terpenoids | Ω-carboxymenaquinone-4    | 27 | 473.275 | 18.03 | Negative | *** | 474.277 | C <sub>31</sub> H <sub>38</sub> O <sub>4</sub> | 205.0598 | 205.0539 | C <sub>14</sub> H <sub>21</sub> O <sup>-</sup>                                                                                                                                                                                                           | <chem>CC(/CC/C=C(C)/CC/C=C(C)(C)=O)[O-])=C(CCC(C)=C/C1(C(=O)C2(C=C\C=C/C(C(=O)C(C)=1)=2))</chem>                                                                                                                                                                                                                                                                                       | <p>InChI=1S/C31H38O4/e1-21(11-8-12-22(2)15-10-16-24(4)31(34)35)13-9-14-23(3)19-20-26-25(5)29(32)27-17-6-7-18-28(27)30(26)33/h6-7,12-13,16-19H,8-11,14-15,20H2,1-</p> | 1667c | 14798a | 14718a | 12107ab | 11427b |  |  |  |  |  |  |  |





|                                       |    |         |       |          |     |          |                                   |                                                                     |                                                                     |                                                                                                                                                                                                                                                                                                                                 |                                                                                       |                                                                                                                                                                                                                                            |       |        |         |         |         |  |  |  |
|---------------------------------------|----|---------|-------|----------|-----|----------|-----------------------------------|---------------------------------------------------------------------|---------------------------------------------------------------------|---------------------------------------------------------------------------------------------------------------------------------------------------------------------------------------------------------------------------------------------------------------------------------------------------------------------------------|---------------------------------------------------------------------------------------|--------------------------------------------------------------------------------------------------------------------------------------------------------------------------------------------------------------------------------------------|-------|--------|---------|---------|---------|--|--|--|
|                                       |    |         |       |          |     |          |                                   | 122.0848<br>102.0708                                                | 122.0727<br>102.0670                                                | C <sub>8</sub> H <sub>10</sub> O <sup>2+</sup><br>C <sub>5</sub> H <sub>10</sub> O <sub>2</sub> <sup>2+</sup>                                                                                                                                                                                                                   | =C(C)C=C(C)C(C)<br>C(=O)C[C@]23(C(C)<br>(C)C[C@H](O)C[C<br>@@](C)(O2)3)               | 29(2)19-14-20-<br>31(4)34(4)27-40-<br>37(7,8)24-33(4)26-<br>39(40,10)45-40/h11-<br>21,32-33,41-42,44H,23-<br>27H2,1-10H3/b12-<br>11+,17-13+,19-14+,28-<br>15+,29-16+,30-18+,31-<br>20+/t22?,32-,33-<br>,38+,39+,40-/m0/s1                  |       |        |         |         |         |  |  |  |
| 4,4'-<br>diaponeuro-<br>porenal       |    |         |       |          |     |          |                                   |                                                                     |                                                                     |                                                                                                                                                                                                                                                                                                                                 | CC(C)=CCCC(C)=<br>C/C=C/C(C)=C/C=C/<br>C/C=C(C)/C=C/C=C<br>(C)/C=C/C(C)/C=C/<br>O     | InChI=1S/C30H40O/c1-<br>25(2)14-10-17-28(5)20-<br>11-18-26(3)15-8-9-16-<br>27(4)19-12-21-29(6)22-<br>13-23-30(7)24-31/h8-<br>9,11-16,18-<br>24H,10,17H2,1-7H3/b9-<br>8+,18-11+,19-12+,22-<br>13+,26-15+,27-16+,28-<br>20+,29-21+,30-23+    |       |        |         |         |         |  |  |  |
| 8'-apo-β-<br>carotenal                |    |         |       |          |     |          |                                   |                                                                     |                                                                     |                                                                                                                                                                                                                                                                                                                                 | CC(/C=C/C=C(C)/C<br>=C/C1(C(CCCC(C)<br>=1)(C)C))=C\C=C\C<br>=C(C)\C=C\C=C(C)\<br>C=O  | InChI=1S/C30H40O/c1-<br>24(13-8-9-14-25(2)16-11-<br>18-27(4)23-31)15-10-17-<br>26(3)20-21-29-28(5)19-<br>12-22-30(29,6)7/h8-<br>11,13-18,20-<br>21,23H,12,19,22H2,1-<br>7H3/b9-8+,15-10+,16-<br>11+,21-20+,24-13+,25-<br>14+,26-17+,27-18+ |       |        |         |         |         |  |  |  |
| apo-8'-<br>lycopenal                  | 33 | 417.303 | 15.71 | Positive | *** | 416.3079 | C <sub>30</sub> H <sub>40</sub> O | 417.3035<br>337.3195<br>318.3003<br>263.2755<br>151.1026<br>67.0690 | 417.3152<br>337.3101<br>318.2912<br>263.2733<br>151.1117<br>67.0542 | C <sub>30</sub> H <sub>41</sub> O <sup>+</sup><br>C <sub>22</sub> H <sub>41</sub> O <sub>2</sub> <sup>+</sup><br>C <sub>22</sub> H <sub>38</sub> O <sub>2</sub> <sup>2+</sup><br>C <sub>19</sub> H <sub>35</sub> <sup>+</sup><br>C <sub>10</sub> H <sub>15</sub> O <sup>+</sup><br>C <sub>5</sub> H <sub>7</sub> O <sup>+</sup> | CC(C)=CCCC(C)=<br>C/C=C/C(C)=C/C=C/<br>C/C(C)=C/C=C/C=C/<br>C(C)/C=C/C(C)/<br>C=O     | InChI=1S/C30H40O/c1-<br>25(2)14-10-17-28(5)19-<br>12-21-29(6)20-11-18-<br>26(3)15-8-9-16-27(4)22-<br>13-23-30(7)24-31/h8-<br>9,11-16,18-<br>24H,10,17H2,1-7H3/b9-<br>8+,18-11+,21-12+,22-<br>13+,26-15+,27-16+,28-<br>19+,29-20+,30-23+    | 9744b | 33258a | 21828ab | 22693ab | 28704ab |  |  |  |
| 4-hydroxy-<br>4,4'-diapo-<br>lycopene |    |         |       |          |     |          |                                   |                                                                     |                                                                     |                                                                                                                                                                                                                                                                                                                                 | CC(C)=C/C=C/C(C)<br>)=C/C=C/C(C)=C/C/<br>=C/C=C(C)/C=C/C=C/<br>C(C)/C=C/C=C(C)/<br>CO | InChI=1S/C30H40O/c1-<br>25(2)14-10-17-28(5)20-<br>11-18-26(3)15-8-9-16-<br>27(4)19-12-21-29(6)22-<br>13-23-30(7)24-31/h8-<br>23,31H,24H2,1-7H3/b9-<br>8+,17-10+,18-11+,19-<br>12+,22-13+,26-15+,27-<br>16+,28-20+,29-21+,30-<br>23+        |       |        |         |         |         |  |  |  |

|                                 |    |         |       |          |     |          |                                                |                                                        |                                                        |                                                                                                                                                                                                                                                   |                                                                     |                                                                                                                                                                                                                                                         |         |         |         |        |        |        |         |        |
|---------------------------------|----|---------|-------|----------|-----|----------|------------------------------------------------|--------------------------------------------------------|--------------------------------------------------------|---------------------------------------------------------------------------------------------------------------------------------------------------------------------------------------------------------------------------------------------------|---------------------------------------------------------------------|---------------------------------------------------------------------------------------------------------------------------------------------------------------------------------------------------------------------------------------------------------|---------|---------|---------|--------|--------|--------|---------|--------|
| 4,4'-diaponeurosporen-1-ol      | 34 | 418.316 | 15.39 | Positive | *** | 418.3236 | C <sub>30</sub> H <sub>42</sub> O              | 337.3508<br>263.2755<br>81.0022                        | 337.3465<br>263.2733<br>81.0699                        | C <sub>23</sub> H <sub>45</sub> O <sup>+</sup><br>C <sub>19</sub> H <sub>35</sub> <sup>+</sup><br>C <sub>6</sub> H <sub>9</sub> <sup>+</sup>                                                                                                      | CC(C)=CCCC(\C)=C/C=C/C(\C)=C/C=C/C(C)/C=C/C(C)/C(O)                 | InChI=1S/C30H42O/c1-25(2)14-10-17-28(5)20-11-18-26(3)15-8-9-16-27(4)19-12-21-29(6)22-13-23-30(7)24-31/h8-9,11-16,18-23,31H,10,17,24H2,1-7H3/b9-8+,18-11+,19-12+,22-13+,26-15+,27-16+,28-20+,29-21+,30-23+                                               | 5383ab  | 7527ab  | 7157ab  | 12007a | 696b   |        |         |        |
| 8'-apo-β-carotenol              |    |         |       |          |     |          |                                                |                                                        |                                                        |                                                                                                                                                                                                                                                   | CC(/C=C/C=C(C)/C=C/C1(/C(C)(C)CC(C)/C=1)=C\C=C\C=C(C)/C=C\C=C(C)CO  | InChI=1S/C30H42O/c1-24(13-8-9-14-25(2)16-11-18-27(4)23-31)15-10-17-26(3)20-21-29-28(5)19-12-22-30(29,6)7/h8-11,13-18,20-21,31H,12,19,22-23H2,1-7H3/b9-8+,15-10+,16-11+,21-20+,24-13+,25-14+,26-17+,27-18+                                               |         |         |         |        |        |        |         |        |
| Derivative                      | 35 | 415.275 | 14.48 | Positive | *** | ***      | ***                                            | 317.2824<br>316.2702<br>135.1185<br>99.0026<br>67.0690 | 317.2839<br>316.2755<br>135.1168<br>99.0804<br>67.0542 | C <sub>22</sub> H <sub>37</sub> O <sup>+</sup><br>C <sub>22</sub> H <sub>36</sub> O <sup>+</sup><br>C <sub>10</sub> H <sub>15</sub> <sup>+</sup><br>C <sub>6</sub> H <sub>11</sub> O <sup>+</sup><br>C <sub>5</sub> H <sub>7</sub> O <sup>+</sup> |                                                                     |                                                                                                                                                                                                                                                         |         |         |         | 3773b  | 6509b  | 7232ab | 13061ab | 17529a |
| 4,4'-diaponeurosporen-1,1-diol  | 36 | 435.309 | 15.46 | Positive | *** | 434.3185 | C <sub>30</sub> H <sub>42</sub> O <sub>2</sub> | 435.3114<br>337.3195<br>280.2745                       | 435.3258<br>337.3101<br>280.2755                       | C <sub>30</sub> H <sub>43</sub> O <sub>2</sub> <sup>+</sup><br>C <sub>22</sub> H <sub>41</sub> O <sub>2</sub> <sup>+</sup><br>C <sub>19</sub> H <sub>36</sub> O <sub>2</sub> <sup>+</sup>                                                         | CC(C)=CCCC(\C)=C/C=C/C(\C)=C/C=C/C(C)/C=C/C(C)/C(O)O                | InChI=1S/C30H42O2/c1-24(2)14-10-17-27(5)20-11-18-25(3)15-8-9-16-26(4)19-12-21-28(6)22-13-23-29(7)30(31)32/h8-9,11-16,18-23,30-32H,10,17H2,1-7H3/b9-8+,18-11+,19-12+,22-13+,25-15+,26-16+,27-20+,28-21+,29-23+                                           | 11247b  | 9062b   | 5276b   | 20988a | 7055b  |        |         |        |
| All-trans-3,4-didehydrolycopene | 37 | 534.429 | 13.65 | Positive | *** | 534.4226 | C <sub>40</sub> H <sub>54</sub>                | 263.2755<br>245.2218<br>179.1751<br>81.0874            | 263.2733<br>245.2264<br>179.1794<br>81.0699            | C <sub>19</sub> H <sub>35</sub> <sup>+</sup><br>C <sub>18</sub> H <sub>29</sub> <sup>+</sup><br>C <sub>13</sub> H <sub>23</sub> <sup>+</sup><br>C <sub>6</sub> H <sub>9</sub> <sup>+</sup>                                                        | CC(C)=C/C=C/C(\C)=C/C=C/C(\C)=C/C=C/C(C)/C=C/C(C)/C=C/C(C)/C(C)C    | InChI=1S/C40H54/c1-33(2)19-13-23-37(7)27-17-31-39(9)29-15-25-35(5)21-11-12-22-36(6)26-16-30-40(10)32-18-28-38(8)24-14-20-34(3)4/h11-13,15-23,25-32H,14,24H2,1-10H3/b12-11+,23-13+,25-15+,26-16+,31-17+,32-18+,35-21+,36-22+,37-27+,38-28+,39-29+,40-30+ | 20063bc | 39634ab | 21145bc | 54265a | 6482c  |        |         |        |
|                                 | 38 | 535.401 | 13.64 | Positive | *** | ***      | ***                                            | 263.2755<br>245.2218<br>179.1751<br>81.0874            | 263.2733<br>245.2264<br>179.1794<br>81.0699            | C <sub>19</sub> H <sub>35</sub> <sup>+</sup><br>C <sub>18</sub> H <sub>29</sub> <sup>+</sup><br>C <sub>13</sub> H <sub>23</sub> <sup>+</sup><br>C <sub>6</sub> H <sub>9</sub> <sup>+</sup>                                                        |                                                                     |                                                                                                                                                                                                                                                         | 743b    | 1531b   | 5909b   | 19405a | 3056b  |        |         |        |
| Derivative                      | 39 | 520.418 | 12.75 | Positive | *** | ***      | ***                                            | 453.3598<br>353.3291                                   | 453.3516<br>353.3203                                   | C <sub>34</sub> H <sub>45</sub> <sup>+</sup><br>C <sub>26</sub> H <sub>41</sub> <sup>+</sup>                                                                                                                                                      |                                                                     |                                                                                                                                                                                                                                                         |         |         |         | 12722a | 9148a  | 16067a | 25445a  | 7848a  |
| 2-hexaprenyl-6-methoxyphenol    | 40 | 532.416 | 12.75 | Positive | *** | 532.4280 | C <sub>37</sub> H <sub>56</sub> O <sub>2</sub> | 353.3291<br>179.1751                                   | 353.3203<br>179.1794                                   | C <sub>26</sub> H <sub>41</sub> <sup>+</sup><br>C <sub>11</sub> H <sub>15</sub> O <sup>+</sup>                                                                                                                                                    | CC(C)=CCCC(\C)=C/CCC(\C)=C/CCC(\C)=C/CCC(\C)=C/C(C)/C=C/C(C)/C(O)OC | InChI=1S/C37H56O2/c1-29(2)15-9-16-30(3)17-10-18-31(4)19-11-20-32(5)21-12-22-33(6)23-13-24-34(7)27-28-35-25-14-26-36(39-                                                                                                                                 | 31548a  | 21610a  | 58841a  | 55124a | 25543a |        |         |        |



|                             |    |         |       |          |     |          |                                                  |                                              |                                              |                                                                                                                                                                                                                                                |                                                                                                                                                                                                                                                                                           |                                                                                                                                                                                                                                                                                                                                                                                                                                                            |         |         |         |         |         |
|-----------------------------|----|---------|-------|----------|-----|----------|--------------------------------------------------|----------------------------------------------|----------------------------------------------|------------------------------------------------------------------------------------------------------------------------------------------------------------------------------------------------------------------------------------------------|-------------------------------------------------------------------------------------------------------------------------------------------------------------------------------------------------------------------------------------------------------------------------------------------|------------------------------------------------------------------------------------------------------------------------------------------------------------------------------------------------------------------------------------------------------------------------------------------------------------------------------------------------------------------------------------------------------------------------------------------------------------|---------|---------|---------|---------|---------|
| odopin derivative           |    |         |       |          |     |          |                                                  | 177.1642<br>119.0752                         | 177.1638<br>119.0855                         | C <sub>13</sub> H <sub>21</sub> <sup>+</sup><br>C <sub>9</sub> H <sub>11</sub> <sup>+</sup>                                                                                                                                                    | C@@H](C(C)(C)O)<br>CC=C(C)C                                                                                                                                                                                                                                                               | 19-31-43(10)33-35-44(45(11,12)46)34-32-37(3)4/h13-14,16-22,24-33,35,44,46H,15,23,34H2,1-12H3/b14-13+,24-16+,25-17+,29-18+,30-19+,35-33+,38-21+,39-22+,40-26+,41-27+,42-28+,43-31+/t44-/m0/s1                                                                                                                                                                                                                                                               |         |         |         |         |         |
|                             | 48 | 664.528 | 13.65 | Positive | *** | ***      | ***                                              | 499.4002<br>129.1272<br>89.0703              | 499.3934<br>129.1274<br>89.0961              | C <sub>36</sub> H <sub>31</sub> O <sup>+</sup><br>C <sub>13</sub> H <sub>21</sub> <sup>+</sup><br>C <sub>5</sub> H <sub>13</sub> O <sup>+</sup>                                                                                                |                                                                                                                                                                                                                                                                                           | 71318b                                                                                                                                                                                                                                                                                                                                                                                                                                                     | 620746a | 486803a | 476005a | 488965a |         |
| Bixin dimethyl ester        | 49 | 409.243 | 4.55  | Positive | *** | 408.2301 | C <sub>26</sub> H <sub>32</sub> O <sub>4</sub>   | 409.2423<br>387.2517<br>189.1635             | 409.2373<br>387.2530<br>189.1638             | C <sub>26</sub> H <sub>33</sub> O <sub>4</sub> <sup>+</sup><br>C <sub>24</sub> H <sub>35</sub> O <sub>4</sub> <sup>+</sup><br>C <sub>14</sub> H <sub>21</sub> <sup>+</sup>                                                                     | CC(/C=C/C=C(C)/C=C/C(OC)=O)=C/C=C(C)C=C/C(C)C=C/C(OC)=O                                                                                                                                                                                                                                   | InChI=1S/C26H32O4/c1-21(13-9-15-23(3)17-19-25(27)29-5)11-7-8-12-22(2)14-10-16-24(4)18-20-26(28)30-6/h7-20H,1-6H3/b8-7+,13-9+,14-10+,19-17+,20-18+,21-11+,22-12+,23-15+,24-16+                                                                                                                                                                                                                                                                              | 5379a   | 7332a   | 6579a   | 7819a   | 6025a   |
| 4,4'-diaplo-lycopene-4-oate | 50 | 430.287 | 4.10  | Positive | *** | 430.2872 | C <sub>30</sub> H <sub>38</sub> O <sub>2</sub>   | 325.2162<br>251.2056<br>127.0729             | 325.2128<br>251.2006<br>127.0754             | C <sub>22</sub> H <sub>29</sub> O <sub>2</sub> <sup>+</sup><br>C <sub>16</sub> H <sub>27</sub> O <sub>2</sub> <sup>+</sup><br>C <sub>7</sub> H <sub>11</sub> O <sub>2</sub> <sup>+</sup>                                                       | CC(C)=C/C=C/C(C/C)=C/C(OC)=C/C=C/C(C)C=C/C(C)/C([O-])=O                                                                                                                                                                                                                                   | InChI=1S/C30H38O2/c1-24(2)14-10-17-27(5)20-11-18-25(3)15-8-9-16-26(4)19-12-21-28(6)22-13-23-29(7)30(3)32/h8-23H,1-7H3,(H,31,32)/p-1/b9-8+,17-10+,18-11+,19-12+,22-13+,25-15+,26-16+,27-20+,28-21+,29-23+                                                                                                                                                                                                                                                   | 610b    | 6060a   | 2401ab  | 3341ab  | 1403ab  |
| oat triterpenoid saponin    | 51 | 1093.58 | 8.88  | Positive | *** | 1093.546 | C <sub>55</sub> H <sub>83</sub> NO <sub>21</sub> | 1023.509<br>1007.475<br>977.4956<br>116.1053 | 1023.516<br>1007.485<br>977.4952<br>116.1070 | C <sub>52</sub> H <sub>79</sub> O <sub>20</sub> <sup>+</sup><br>C <sub>51</sub> H <sub>75</sub> O <sub>20</sub> <sup>+</sup><br>C <sub>47</sub> H <sub>77</sub> O <sub>21</sub> <sup>+</sup><br>C <sub>6</sub> H <sub>14</sub> NO <sup>+</sup> | C[C@]2(C=O)([C@@H](OC(=O)C1(\C\NC)=C/C=C=1))C[C@@]4(C)([C@@H](C2)[C@@]35(O[C@@H]3[C@H]6([C@](C)([C@](C)(C)[C@H](O)4)5)C[C@@H]%)10([C@@]([C]6)CC[C@H](O[C@@H]9)OC[C@@H](O[C@@H]7(O[C@H](CO)[C@@H](O)[C@H](O)[C@@H](O)7)(O)[C@@H](O)[C@H](O)[C@@H](O)8)(O)[C@@H](O)8))9))([C@](CO)(C%10)))) | InChI=1S/C55H83NO21/c1-49(23-59)17-32-51(3,19-36(49)74-45(69)25-10-8-9-11-26(25)56-7)33(61)18-54(6)53(5)15-12-30-50(2,31(53)16-35-55(32,54)77-35)14-13-34(52(30,4)24-60)75-48-44(76-47-43(68)41(66)38(63)28(21-58)72-47)39(64)29(22-70-48)73-46-42(67)40(65)37(62)27(20-57)71-46/h8-11,23,27-44,46-48,56-58,60-68H,12-22,24H2,1-7H3/t27-,28-,29+,30-,31-,32-,33+,34+,35-,36+,37-,38-,39+,40+,41+,42-,43-,44-,46+,47+,48+,49+,50+,51+,52+,53-,54+,55-/m1/s1 | 334b    | 5430b   | 45088a  | 24175ab | 18271ab |

|                  |                                           |    |         |       |          |         |          |                                                              |                                            |                                            |                                                                                                                                                                              |                                                                                                                                                                                                   |                                                                                                                                                                                                                                                                                                                        |        |        |         |         |        |
|------------------|-------------------------------------------|----|---------|-------|----------|---------|----------|--------------------------------------------------------------|--------------------------------------------|--------------------------------------------|------------------------------------------------------------------------------------------------------------------------------------------------------------------------------|---------------------------------------------------------------------------------------------------------------------------------------------------------------------------------------------------|------------------------------------------------------------------------------------------------------------------------------------------------------------------------------------------------------------------------------------------------------------------------------------------------------------------------|--------|--------|---------|---------|--------|
| Oligosaccharides | Maltopentaose derivative                  | 52 | 537.321 | 14.41 | Negative | 537.321 | 537.2036 | C <sub>19</sub> H <sub>37</sub> O <sub>17</sub> <sup>-</sup> | 282.089                                    | 282.0962                                   | C <sub>10</sub> H <sub>18</sub> O <sub>9</sub> <sup>2-</sup>                                                                                                                 | C([C@H]5(O[C@H](O[C@@H]4([C@H](O[C@H](O[C@@H]1([C@H](O[C@@H]([C@H]1O)O)O[C@@H]2([C@H](O[C@@H]([C@H]2O)O)O[C@@H]3([C@H](OC([C@H](C[H]3O)O)O)CO)CO))([C@H]([C@H]4O)O)CO)[C@@H]([C@H]([C@@H]5O)O)O)O | InChI=1S/C30H52O26/c31-1-6-11(36)12(37)18(43)27(49-6)54-23-8(3-33)51-29(20(45)14(23)39)56-25-10(5-35)52-30(21(46)16(25)41)55-24-9(4-34)50-28(19(44)15(24)40)53-22-7(2-32)48-26(47)17(42)13(22)38/h6-47H,1-5H2/16-,7-,8-,9-,10-,11-,12+,13-,14-,15-,16-,17-,18-,19-,20-,21-,22-,23-,24-,25-,26?,27-,28-,29-,30-/m1/s1   | 7707bc | 15163a | 10442ab | 13790ab | 3479c  |
|                  |                                           | 53 | 699.371 | 12.92 | Negative | 699.371 | 699.3081 | C <sub>30</sub> H <sub>51</sub> O <sub>18</sub> <sup>-</sup> | 255.2312                                   | 255.2330                                   | C <sub>16</sub> H <sub>31</sub> O <sub>2</sub> <sup>-</sup>                                                                                                                  |                                                                                                                                                                                                   | 8278bc                                                                                                                                                                                                                                                                                                                 | 10237b | 8050bc | 15818a  | 4038bc  |        |
| Organosulfates   | Dodecyl sulfate                           | 54 | 265.147 | 14.37 | Negative | ***     | 266.1552 | C <sub>12</sub> H <sub>26</sub> O <sub>4</sub> S             | 265.1483<br>185.1888<br>79.9586<br>96.9639 | 265.1479<br>185.1911<br>79.9579<br>96.9601 | C <sub>12</sub> H <sub>25</sub> O <sub>4</sub> S <sup>-</sup><br>C <sub>12</sub> H <sub>25</sub> O <sub>3</sub> S <sup>2-</sup><br>HO <sub>4</sub> S <sup>-</sup>            | CCCCCCCCCCCCOS([O-])(=O)=O                                                                                                                                                                        | InChI=1S/C12H26O4S/c1-2-3-4-5-6-7-8-9-10-11-12-16-17(13,14)15/h2-12H2,1H3,(H,13,14,15)/p-1                                                                                                                                                                                                                             | 664b   | 33273a | 36116a  | 22823a  | 21551a |
| Galactolipids    | 1-16:0-2-18:1-digalactosyl-diacylglycerol |    |         |       |          |         |          |                                                              |                                            |                                            |                                                                                                                                                                              | CCCCCCCC\C=C/CCCCCCCC(OC(COC2(OC(COC1(OC(CO)C(O)C(O)C(O)1))C(O)C(O)C(O)2))COC(=O)CCCCCCCCCCCCCCCC)=O                                                                                              | InChI=1S/C49H90O15/c1-3-5-7-9-11-13-15-17-18-20-22-24-26-28-30-32-41(52)62-37(34-59-40(51)31-29-27-25-23-21-19-16-14-12-10-8-6-4-2)35-60-48-47(58)45(56)43(54)39(64-48)36-61-49-46(57)44(55)42(53)38(33-50)63-49/h17-18,37-39,42-50,53-58H,3-16,19-36H2,1-2H3/b18-17-                                                  |        |        |         |         |        |
|                  | 1-18:1-2-16:0-digalactosyl-diacylglycerol | 55 | 918.598 | 5.72  | Positive | ***     | 918.628  | C <sub>49</sub> H <sub>90</sub> O <sub>15</sub>              | 755.5129<br>414.4031<br>163.0601           | 755.5151<br>414.4073<br>163.0965           | C <sub>38</sub> H <sub>75</sub> O <sub>14</sub> <sup>+</sup><br>C <sub>26</sub> H <sub>54</sub> O <sub>3</sub><br>C <sub>7</sub> H <sub>15</sub> O <sub>4</sub> <sup>+</sup> | CCCCCCCC\C=C/CCCCCCCC(OC[C@H](CO[C@@H]2(O[C@H](CO[C@@H]1(O[C@H](CO)C[C@H](O)C[C@H](O)C[C@H](O)1)))[C@H](O)[C@H](O)[C@@H](O)2)OC(=O)CCCCCCCCCCCCC(=O)C                                             | InChI=1S/C49H90O15/c1-3-5-7-9-11-13-15-17-18-20-21-23-25-27-29-31-40(51)59-34-37(62-41(52)32-30-28-26-24-22-19-16-14-12-10-8-6-4-2)35-60-48-47(58)45(56)43(54)39(64-48)36-61-49-46(57)44(55)42(53)38(33-50)63-49/h17-18,37-39,42-50,53-58H,3-16,19-36H2,1-2H3/b18-17/t37-38-,39-,42+,43+,44+,45+,46-,47-,48-,49-/m1/s1 | 424b   | 76927a | 47256ab | 35300ab | 21583b |

|               |                                                           |    |         |       |          |     |          |                                                                |                                                         |                                                         |                                                                                                                                                                                                                                                                                                                        |                                                                                                                                                       |                                                                                                                                                                                                                                                                                                                                                                                                                                             |         |         |         |         |         |        |
|---------------|-----------------------------------------------------------|----|---------|-------|----------|-----|----------|----------------------------------------------------------------|---------------------------------------------------------|---------------------------------------------------------|------------------------------------------------------------------------------------------------------------------------------------------------------------------------------------------------------------------------------------------------------------------------------------------------------------------------|-------------------------------------------------------------------------------------------------------------------------------------------------------|---------------------------------------------------------------------------------------------------------------------------------------------------------------------------------------------------------------------------------------------------------------------------------------------------------------------------------------------------------------------------------------------------------------------------------------------|---------|---------|---------|---------|---------|--------|
|               | 1-20:2-2-18:3-monogalactosyldiacylglycerol                | 56 | 804.619 | 18.58 | Positive | *** | 804.5751 | C <sub>47</sub> H <sub>80</sub> O <sub>10</sub>                | 800.6283<br>745.6114<br>657.6029<br>147.0184<br>59.0198 | 800.6367<br>745.6188<br>657.6028<br>147.0652<br>59.0128 | C <sub>46</sub> H <sub>88</sub> O <sub>10</sub> <sup>2+</sup><br>C <sub>43</sub> H <sub>85</sub> O <sub>9</sub> <sup>+</sup><br>C <sub>40</sub> H <sub>81</sub> O <sub>8</sub> <sup>+</sup><br>C <sub>6</sub> H <sub>11</sub> O <sub>4</sub> <sup>+</sup><br>C <sub>2</sub> H <sub>3</sub> O <sub>2</sub> <sup>+</sup> | CCCCC\C=C/C/C=C/C/CCCCCCCCC(OC[C@@H](OC(=O)CCCCCCC\C=C/C/C=C/C/C=CC)CO[C@@H]1(O[C@H](CO)[C@H](O)[C@H](O)[C@@H](O)1))=O                                | InChI=1S/C47H80O10/c1-3-5-7-9-11-13-15-17-19-20-22-23-25-27-29-31-33-35-42(49)54-38-40(39-55-47-46(53)45(52)44(51)41(37-48)57-47)56-43(50)36-34-32-30-28-26-24-21-18-16-14-12-10-8-6-4-2/h6,8,11-14,17-19,21,40-41,44-48,51-53H,3-5,7,9-10,15-16,20,22-39H2,1-2H3/b8-6-,13-11-,14-12-,19-17-,21-18-/t40-,41-,44+,45+,46-,47-/m1/s1                                                                                                          | 618b    | 1922b   | 5789ab  | 9560a   | 4055ab  |        |
|               | Derivative of 1-20:2-2-18:3-monogalactosyldiacylglycerol  | 57 | 542.391 | 12.28 | Positive | *** | ***      | ***                                                            | 471.3304<br>147.0184<br>59.0198                         | 471.3316<br>147.0652<br>59.0128                         | C <sub>26</sub> H <sub>47</sub> O <sub>7</sub> <sup>+</sup><br>C <sub>4</sub> H <sub>11</sub> O <sub>4</sub> <sup>+</sup><br>C <sub>2</sub> H <sub>3</sub> O <sub>2</sub> <sup>+</sup>                                                                                                                                 |                                                                                                                                                       |                                                                                                                                                                                                                                                                                                                                                                                                                                             | 112645a | 99893a  | 103646a | 115405a | 93762a  |        |
| Pterostes     | (6S)-5-formyl-tetrahydrofolate tri-L-glutamate            | 58 | 732.253 | 16.64 | Positive | *** | 731.2511 | C <sub>30</sub> H <sub>37</sub> N <sub>9</sub> O <sub>13</sub> | 731.2555<br>377.1557<br>377.1424                        | 731.2511<br>377.1576<br>377.1456                        | C <sub>30</sub> H <sub>37</sub> N <sub>9</sub> O <sub>13</sub><br>C <sub>18</sub> H <sub>23</sub> N <sub>3</sub> O <sub>6</sub> <sup>2+</sup><br>C <sub>17</sub> H <sub>21</sub> N <sub>4</sub> O <sub>6</sub> <sup>+</sup>                                                                                            | C(NC1(C=C/C/C(=O)N[C@H](C(=O)O-])CCC(N[C@H](C(=O)O-])CCC(N[C@H](C(=O)O-])CCC([O-])CCC([O-])=O)=O)=O)=O=C(=1))[C@H]2(CNC3(/N=C(N)NC(=O)C(/N(C=O)2)=3)) | InChI=1S/C30H37N9O13/c31-30-37-24-23(26(46)38-30)39(13-40)16(12-33-24)11-32-15-3-1-14(2-4-15)25(45)336-19(29(51)52)6-9-21(42)34-17(27(47)48)5-8-20(41)35-18(28(49)50)7-10-22(43)44/h1-4,13,16-19,32H,5-12H2,(H,34,42)(H,35,41)(H,36,45)(H,43,44)(H,47,48)(H,49,50)(H,51,52)(H4,31,33,37,38,46)/p-4/t16-,17-,18-,19-/m0/s1                                                                                                                   | 9088a   | 10446a  | 14402a  | 16403a  | 9622a   |        |
|               |                                                           | 59 | 731.239 | 16.61 | Positive | *** | 731.2511 | C <sub>30</sub> H <sub>37</sub> N <sub>9</sub> O <sub>13</sub> | 732.2498<br>731.2555<br>377.1557<br>377.1424            | 732.2584<br>731.2511<br>377.1576<br>377.1456            | C <sub>30</sub> H <sub>38</sub> N <sub>9</sub> O <sub>13</sub> <sup>+</sup><br>C <sub>30</sub> H <sub>37</sub> N <sub>9</sub> O <sub>13</sub><br>C <sub>18</sub> H <sub>23</sub> N <sub>3</sub> O <sub>6</sub> <sup>2+</sup><br>C <sub>17</sub> H <sub>21</sub> N <sub>4</sub> O <sub>6</sub> <sup>+</sup>             |                                                                                                                                                       |                                                                                                                                                                                                                                                                                                                                                                                                                                             |         | 6853b   | 14731b  | 18909ab | 20945ab | 21331a |
|               |                                                           | 60 | 733.230 | 16.62 | Positive | *** | 731.2511 | C <sub>30</sub> H <sub>37</sub> N <sub>9</sub> O <sub>13</sub> |                                                         |                                                         |                                                                                                                                                                                                                                                                                                                        |                                                                                                                                                       |                                                                                                                                                                                                                                                                                                                                                                                                                                             |         |         | 713b    | 3235b   | 10180a  | 11010a |
|               | Derivative                                                | 61 | 378.109 | 16.58 | Positive | *** | ***      | ***                                                            | 377.1557<br>377.1424                                    | 377.1576<br>377.1456                                    | C <sub>18</sub> H <sub>23</sub> N <sub>3</sub> O <sub>6</sub> <sup>2+</sup><br>C <sub>17</sub> H <sub>21</sub> N <sub>4</sub> O <sub>6</sub> <sup>+</sup>                                                                                                                                                              |                                                                                                                                                       |                                                                                                                                                                                                                                                                                                                                                                                                                                             | 6305b   | 17283ab | 28965a  | 24603a  | 22768a  |        |
| Phospholipids | 1-octadec-11-enoyl-sn-glycerol 3-phosphate                | 62 | 435.246 | 17.4  | Negative | *** | 436.2590 | C <sub>21</sub> H <sub>41</sub> O <sub>7</sub> P               | 286.2508<br>149.0009                                    | 286.2505<br>149.0034                                    | C <sub>17</sub> H <sub>34</sub> O <sub>3</sub><br>C <sub>4</sub> H <sub>6</sub> O <sub>4</sub> P <sup>-</sup>                                                                                                                                                                                                          | CCCCC\C=C/C/CCC<br>CCCCCCC(=O)OC[C@@H](O)COP(=O)([O-])[O-]                                                                                            | InChI=1S/C21H41O7P/c1-2-3-4-5-6-7-8-9-10-11-12-13-14-15-16-17-21(23)27-18-20(22)19-28-29(24,25)26/h7-8,20,22H,2-6,9-19H2,1H3,(H2,24,25,26)/p-2/b8-7-/t20-/m1/s1<br>InChI=1S/C21H41O7P/c1-2-3-4-5-6-7-8-9-10-11-12-13-14-15-16-17-21(23)27-18-20(22)19-28-29(24,25)26/h7-8,20,22H,2-6,9-19H2,1H3,(H2,24,25,26)/p-2/b8-7-/t20-/m1/s1<br>InChI=1S/C21H41O7P/c1-2-3-4-5-6-7-8-9-10-11-12-13-14-15-16-17-21(23)27-18-20(22)19-28-29(24,25)26/h9- | 719c    | 34393ab | 35342ab | 55098a  | 17958bc |        |
|               | CCCCC\C=C/C/CCC<br>CCCCCCC(=O)OC[C@H](COP(=O)([O-])[O-])O |    |         |       |          |     |          |                                                                |                                                         |                                                         |                                                                                                                                                                                                                                                                                                                        |                                                                                                                                                       |                                                                                                                                                                                                                                                                                                                                                                                                                                             |         |         |         |         |         |        |
|               | CCCCC\C=C/C/CCC<br>CCCCCCC(=O)OC[C@H](COP([O-])=O)O       |    |         |       |          |     |          |                                                                |                                                         |                                                         |                                                                                                                                                                                                                                                                                                                        |                                                                                                                                                       |                                                                                                                                                                                                                                                                                                                                                                                                                                             |         |         |         |         |         |        |









|            |                                                      |         |         |          |          |          |          |                            |                                             |                                              |                                                                                               |                                                                                                                                                                                  |                                                                                                                                                                                                                                                                                                    |               |         |           |          |         |
|------------|------------------------------------------------------|---------|---------|----------|----------|----------|----------|----------------------------|---------------------------------------------|----------------------------------------------|-----------------------------------------------------------------------------------------------|----------------------------------------------------------------------------------------------------------------------------------------------------------------------------------|----------------------------------------------------------------------------------------------------------------------------------------------------------------------------------------------------------------------------------------------------------------------------------------------------|---------------|---------|-----------|----------|---------|
|            | phosphoethanolamine (n-C14:1)                        |         |         |          |          |          |          | 171.1368<br>145.1196       | 171.1380<br>145.1223                        | $C_{10}H_{16}O_2^+$<br>$C_8H_{17}O_2^+$      | O)COP(OCC[NH3+])<br>([O-])=O=O                                                                | 12-13-19(22)25-16-18(21)17-27-28(23,24)26-15-14-20/h7-8,18,21H,2-6,9-17,20H2,1H3,(H,23,24)/t18-/m1/s1                                                                            |                                                                                                                                                                                                                                                                                                    |               |         |           |          |         |
|            | 2-acyl-sn-glycero-3-phosphoethanolamine (n-C14:1)    |         |         |          |          |          |          |                            |                                             |                                              | CCCCC/C=C/CCC<br>CCC(=O)O[C@H](<br>CO)COP(OCC[NH3<br>+])([O-])=O                              | InChI=1S/C19H38NO7P/<br>c1-2-3-4-5-6-7-8-9-10-11-<br>12-13-19(22)27-18(16-<br>21)17-26-28(23,24)25-15-<br>14-20/h7-8,18,21H,2-6,9-<br>17,20H2,1H3,(H,23,24)/b<br>8-7+/t18-/m1/s1 |                                                                                                                                                                                                                                                                                                    |               |         |           |          |         |
|            | Sphingolipids<br>(Sphingomyelin d18:1-C20:0)         | 82      | 759.653 | 17.57    | Positive | ***      | 759.6375 | $C_{43}H_{88}N_2O_6P^+$    | 747.6422<br>184.1000<br>184.0646<br>18.0324 | 747.6375<br>184.0966<br>184.0733<br>18.0338  | $C_{42}H_{88}N_2O_6P^+$<br>$C_5H_{17}N_2O_3P^{2+}$<br>$C_3H_{15}NO_4P^+$<br>$NH_4^+$          | C(CCC)CCCCCCC<br>CCC=CC(CNC(=O)<br>CCCCCCCCCCCC<br>CCCCCCC)COP(O<br>CC[N+1](C)(C)C)(<br>O-1])=O=O                                                                                | InChI=1S/C43H87N2O6<br>P/c1-6-8-10-12-14-16-18-<br>20-21-22-23-25-27-29-<br>31-33-35-37-43(47)44-<br>41(40-51-52(48,49)50-39-<br>38-45(3,4)5)42(46)36-34-<br>32-30-28-26-24-19-17-<br>15-13-11-9-7-<br>2/h3,36,41-42,46H,6-<br>33,35,37-40H2,1-5H3,(H-<br>,44,47,48,49)/b36-<br>34+/t41-,42+/m1/s1 | 1489a         | 8921a   | 8782a     | 24048a   | 15776a  |
|            |                                                      | 83      | 759.631 | 17.75    | Positive | ***      | 759.6375 | $C_{43}H_{88}N_2O_6P^+$    | 747.6422<br>184.1000<br>125.0303            | 747.6375<br>184.0966<br>125.0362             | $C_{42}H_{88}N_2O_6P^+$<br>$C_5H_{17}N_2O_3P^{2+}$<br>$C_3H_{10}O_3P^+$                       |                                                                                                                                                                                  |                                                                                                                                                                                                                                                                                                    | 1922b         | 2462b   | 8169ab    | 12633a   | 13204a  |
|            | Derivative of<br>sphingomyelin d18:1-C20:0           | 84      | 520.408 | 12.29    | Positive | ***      | ***      | ***                        | 184.1000<br>125.0303                        | 184.0966<br>125.0362                         | $C_5H_{17}N_2O_3P^{2+}$<br>$C_3H_{10}O_3P^+$                                                  | C(CCC)CCCCCCC<br>CCC=CC(CNC(=O)<br>CCCCCCCCCCCC<br>CCCCCCC)COP(O<br>CC[N+1](C)(C)C)(<br>O-1])=O=O                                                                                | InChI=1S/C43H87N2O6<br>P/c1-6-8-10-12-14-16-18-<br>20-21-22-23-25-27-29-<br>31-33-35-37-43(47)44-<br>41(40-51-52(48,49)50-39-<br>38-45(3,4)5)42(46)36-34-<br>32-30-28-26-24-19-17-<br>15-13-11-9-7-<br>2/h3,36,41-42,46H,6-<br>33,35,37-40H2,1-5H3,(H-<br>,44,47,48,49)/b36-<br>34+/t41-,42+/m1/s1 | 1061497<br>ab | 877094b | 1066434ab | 1735373a | 772368b |
|            |                                                      | 85      | 518.781 | 12.53    | Positive | ***      | ***      | ***                        |                                             |                                              |                                                                                               |                                                                                                                                                                                  |                                                                                                                                                                                                                                                                                                    | 3621b         | 3281b   | 5647ab    | 10499a   | 3443b   |
|            |                                                      | 86      | 532.417 | 12.52    | Positive | ***      | ***      | ***                        |                                             |                                              |                                                                                               |                                                                                                                                                                                  |                                                                                                                                                                                                                                                                                                    | 6423a         | 5326a   | 11592a    | 9449a    | 6267a   |
|            |                                                      | 87      | 756.611 | 18.42    | Positive | ***      | ***      | ***                        |                                             |                                              |                                                                                               |                                                                                                                                                                                  |                                                                                                                                                                                                                                                                                                    | 858b          | 2341b   | 6869b     | 10513b   | 60861a  |
|            |                                                      | 88      | 522.424 | 13.23    | Positive | ***      | ***      | ***                        |                                             |                                              |                                                                                               |                                                                                                                                                                                  |                                                                                                                                                                                                                                                                                                    | 23692a        | 27609a  | 29343a    | 40339a   | 18989a  |
|            |                                                      | 89      | 496.406 | 12.84    | Positive | ***      | ***      | ***                        |                                             |                                              |                                                                                               |                                                                                                                                                                                  |                                                                                                                                                                                                                                                                                                    | 44685a        | 41349a  | 50800a    | 64021a   | 41028a  |
|            |                                                      | 90      | 782.631 | 18.22    | Positive | ***      | ***      | ***                        |                                             |                                              |                                                                                               |                                                                                                                                                                                  |                                                                                                                                                                                                                                                                                                    | 728a          | 4808a   | 22343a    | 53500a   | 37421a  |
|            |                                                      | 91      | 494.390 | 12.02    | Positive | ***      | ***      | ***                        |                                             |                                              |                                                                                               |                                                                                                                                                                                  |                                                                                                                                                                                                                                                                                                    | 18078a        | 20637a  | 17885a    | 36683a   | 15746a  |
|            | 92                                                   | 516.320 | 11.71   | Positive | ***      | ***      | ***      | 5282a                      | 7201a                                       | 8335a                                        | 9267a                                                                                         | 7982a                                                                                                                                                                            |                                                                                                                                                                                                                                                                                                    |               |         |           |          |         |
|            | 93                                                   | 758.643 | 18.13   | Positive | ***      | ***      | ***      | 1620b                      | 25582a                                      | 48302a                                       | 44707a                                                                                        | 49826a                                                                                                                                                                           |                                                                                                                                                                                                                                                                                                    |               |         |           |          |         |
|            | Phosphatidylglyceride (22:6-22:6) linked with sugar  | 94      | 1081.51 | 6.9      | Negative | ***      | 1082.521 | $C_{54}H_{83}O_{20}P$      | 1081.519<br>595.3708                        | 1081.514<br>595.3769                         | $C_{54}H_{82}O_{20}P^+$<br>$C_{33}H_{56}O_7P^+$                                               | C(C=CCC=CCC=C<br>CC=CCC=CCC)C=<br>CCCC(=O)OC(COP<br>(O)(=O)OCC(O)CO<br>COC(CCC=CCC=C<br>CC=CCC=CCC=CC<br>C=CCC)=O                                                                | -                                                                                                                                                                                                                                                                                                  | 12599a        | 37125a  | 30190a    | 35496a   | 25346a  |
|            | Phosphatidylglyceride linked sugar derivative        | 95      | 638.323 | 12.07    | Negative | 638.3175 | 638.3231 | $C_{33}H_{51}O_{10}P^{2-}$ | 279.2312                                    | 279.2330                                     | $C_{18}H_{31}O_2^-$                                                                           |                                                                                                                                                                                  | 13013b                                                                                                                                                                                                                                                                                             | 16267b        | 22012b  | 74612a    | 15189b   |         |
| Acylsugars | Sucrose 2-isovaleroyl-3-isodecanoylel-4-isobutanoate | 96      | 669.392 | 17.54    | Positive | ***      | 650.3514 | $C_{31}H_{54}O_{14}$       | 540.30261<br>33.0797<br>75.0442             | 540.3015<br>133.0859<br>75.0441              | $C_{24}H_{46}NO_{12}^+$<br>$C_6H_{13}O_3^+$<br>$C_3H_7O_2^+$                                  | CCC(C)C(=O)O[C<br>@H]2([C@@H](O[C<br>C@@1]([O][C@H](C<br>O)[C@H]([C@H](O<br>1)O)CO)O[C@@H]<br>([C@@H]([C@@H](O<br>(C)C)[C@@H]2OC<br>(=O)CCCCC(C)C<br>)CO)                        | InChI=1S/C31H54O14/c1<br>-7-19(6)29(39)43-26-<br>25(41-22(35)13-11-9-8-<br>10-12-17(2)3)24(42-<br>28(38)18(4)5)21(15-<br>33)40-30(26)45-31(16-<br>34)27(37)23(36)20(14-<br>32)44-31/h17-21,23-<br>27,30,32-34,36-37H,7-<br>16H2,1-6H3/t19,20-,21-<br>,23-,24-,25+,26-,27+,30-                      | 8268b         | 50134a  | 38215a    | 30053a   | 33425a  |
|            | Sucrose 2-isovaleroyl-3-isodecanoylel-4-             | 97      | 455.271 | 14.50    | Positive | ***      | 451.2719 | $C_{31}H_{59}NO_{14}^{2+}$ | 415.259<br>261.2427<br>133.0797<br>433.2463 | 415.2406<br>261.2427<br>133.0859<br>433.2431 | $C_{17}H_{37}NO_{10}^{2+}$<br>$C_{15}H_{35}O_3^+$<br>$C_6H_{13}O_3^+$<br>$C_{21}H_{37}NO_9^+$ |                                                                                                                                                                                  | 3213a                                                                                                                                                                                                                                                                                              | 4242a         | 6168a   | 7360a     | 10256a   |         |
|            |                                                      | 98      | 637.368 | 18.92    | Positive | ***      | 636.3357 | $C_{30}H_{52}O_{14}$       | 637.3501                                    | 637.3430                                     | $C_{30}H_{53}O_{14}^+$                                                                        |                                                                                                                                                                                  | 4919b                                                                                                                                                                                                                                                                                              | 27667a        | 20616a  | 15710ab   | 17364ab  |         |

|                         |    |     |     |          |     |     |     |                                                                      |                                                                      |                                                                                                                                                                                                                                                                                                                                                                                          |            |   |   |   |   |   |
|-------------------------|----|-----|-----|----------|-----|-----|-----|----------------------------------------------------------------------|----------------------------------------------------------------------|------------------------------------------------------------------------------------------------------------------------------------------------------------------------------------------------------------------------------------------------------------------------------------------------------------------------------------------------------------------------------------------|------------|---|---|---|---|---|
| isobutanoate derivative | 99 | *** | *** | Positive | *** | *** | *** | 544.4005<br>478.3249<br>457.2729<br>433.2463<br>417.2798<br>387.2319 | 544.3964<br>478.3131<br>457.2796<br>433.2431<br>417.2847<br>387.2377 | C <sub>30</sub> H <sub>56</sub> O <sub>8</sub> <sup>2+</sup><br>C <sub>24</sub> H <sub>46</sub> O <sub>9</sub> <sup>2+</sup><br>C <sub>24</sub> H <sub>41</sub> O <sub>8</sub> <sup>+</sup><br>C <sub>21</sub> H <sub>37</sub> O <sub>9</sub> <sup>+</sup><br>C <sub>22</sub> H <sub>41</sub> O <sub>7</sub> <sup>+</sup><br>C <sub>20</sub> H <sub>35</sub> O <sub>7</sub> <sup>+</sup> | ,31+/ml/s1 | - | - | - | - | - |
|-------------------------|----|-----|-----|----------|-----|-----|-----|----------------------------------------------------------------------|----------------------------------------------------------------------|------------------------------------------------------------------------------------------------------------------------------------------------------------------------------------------------------------------------------------------------------------------------------------------------------------------------------------------------------------------------------------------|------------|---|---|---|---|---|

**Table S2: Identification of the set of metabolites found in untreated fruits. Treatments having different lowercase letters are significantly different using one-way ANOVA and Duncan test ( $p \leq 0.05$ )**

|                   | Compounds                                         | Features | MS1 Feature | RT (min) | Ion mode | Monoisotopic mass |          |                                                 | Fragments (MS/MS)                            |                                              |                                                                                                                                                                                                             | Smiles                                                                                           | InChI                                                                                                                     | Abundance in fruits from treated plants with chitosan (mg.mL <sup>-1</sup> ) |        |         |        |        |
|-------------------|---------------------------------------------------|----------|-------------|----------|----------|-------------------|----------|-------------------------------------------------|----------------------------------------------|----------------------------------------------|-------------------------------------------------------------------------------------------------------------------------------------------------------------------------------------------------------------|--------------------------------------------------------------------------------------------------|---------------------------------------------------------------------------------------------------------------------------|------------------------------------------------------------------------------|--------|---------|--------|--------|
|                   |                                                   |          |             |          |          | Detected          | Database | Formulae                                        | Detected                                     | Database                                     | Formulae                                                                                                                                                                                                    |                                                                                                  |                                                                                                                           | 0                                                                            | 0.25   | 0.50    | 0.75   | 1      |
| Benzenesulfonates | 4-(3-butylnonyl)-benzenesulfonic acid             | 100      | 339.201     | 17.11    | Negative | ***               | ***      | ***                                             | 119.0502<br>79.9586                          | 119.0536<br>79.9579                          | C <sub>2</sub> H <sub>11</sub> OS <sup>-</sup><br>O <sub>3</sub> S <sup>2-</sup>                                                                                                                            | OS(C1=CC=C(CCC(CCCCC)CCCC)C=C1)(=O)=O                                                            | -                                                                                                                         | 17618ab                                                                      | 21411a | 6756ab  | 1394b  | 848b   |
|                   | Derivative                                        | 101      | 311.168     | 14.95    | Negative | ***               | ***      | ***                                             |                                              |                                              |                                                                                                                                                                                                             |                                                                                                  |                                                                                                                           | 24706ab                                                                      | 35491a | 24741ab | 6113b  | 655b   |
|                   |                                                   | 102      | 340.199     | 17.17    | Negative | ***               | ***      | ***                                             | 120.0609                                     | 120.0687                                     | C <sub>5</sub> H <sub>12</sub> OS                                                                                                                                                                           |                                                                                                  |                                                                                                                           | 1147b                                                                        | 4788a  | 3363ab  | 612b   | 522b   |
|                   |                                                   | 103      | 325.183     | 15.92    | Negative | ***               | ***      | ***                                             | 119.0536                                     | 119.0502                                     | C <sub>5</sub> H <sub>11</sub> OS <sup>-</sup>                                                                                                                                                              |                                                                                                  |                                                                                                                           | 8866a                                                                        | 4375b  | 2824bc  | 430c   | 305c   |
| Benzoates         | Benzoate                                          | 104      | 121.030     | 5.54     | Negative | ***               | 122.0368 | C <sub>7</sub> H <sub>6</sub> O <sub>2</sub>    | 121.0251<br>77.0404                          | 121.0295<br>77.0397                          | C <sub>7</sub> H <sub>5</sub> O <sub>2</sub> <sup>-</sup><br>C <sub>6</sub> H <sub>5</sub> <sup>-</sup>                                                                                                     | C(C1\C=C/C=C\C=C=1))([O-])=O                                                                     | InChI=1S/C7H6O2/c8-7(9)6-4-2-1-3-5-6/h1-5H,(H,8,9)/p-1                                                                    | 23846a                                                                       | 11406a | 21388a  | 12073a | 15834a |
| Phenylpropanoids  | 8-geranylumbelliferone                            | 105      | 297.151     | 13.94    | Negative | ***               | 298.1569 | C <sub>19</sub> H <sub>22</sub> O <sub>3</sub>  | 297.1510<br>183.1403<br>114.1410<br>113.1316 | 297.1496<br>183.1391<br>114.1409<br>113.1336 | C <sub>19</sub> H <sub>21</sub> O <sub>3</sub> <sup>-</sup><br>C <sub>11</sub> H <sub>19</sub> O <sub>2</sub> <sup>-</sup><br>C <sub>8</sub> H <sub>18</sub><br>C <sub>8</sub> H <sub>17</sub> <sup>-</sup> | CC(C)=CCCC(C)=C/CC1/(C2(OC(=O)\C=C/C(C=O)=C(C=O)=1)=2))                                          | InChI=1S/C19H22O3/c1-13(2)5-4-6-14(3)7-10-16-17(20)11-8-15-9-12-18(21)22-19(15)16/h5,7-9,11-12,20H,4,6,10H2,1-3H3/b14-7+  | 9567ab                                                                       | 10753a | 8458ab  | 2327ab | 945b   |
|                   | 3-O-digalloyl-1,2,4,6-tetra-O-β-D-galloyl-glucose | 106      | 1093.18     | 8.85     | Positive | ***               | 1092.129 | C <sub>48</sub> H <sub>36</sub> O <sub>30</sub> | 187.0958<br>183.0640<br>129.1276             | 187.0965<br>183.0652<br>129.1274             | C <sub>9</sub> H <sub>15</sub> O <sub>4</sub> <sup>+</sup><br>C <sub>9</sub> H <sub>11</sub> O <sub>4</sub> <sup>+</sup><br>C <sub>8</sub> H <sub>17</sub> O <sup>+</sup>                                   | C(OC(C1\C=C(C(\O)=C(/C=1)\O)\O))=O)[C@H]6(O[C@H]([C@H](OC(C2\C=C(C(\O)=C(/C=2)\O)\O))=O)[C@@H](O | InChI=1S/C48H36O30/c49-20-1-14(2-21(50)33(20)60)42(66)72-13-32-39(75-44(68)16-5-24(53)35(62)25(54)6-16)40(76-46(70)19-11- | 13127a                                                                       | 4264b  | 1671b   | 539b   | 481b   |

|             |                       |         |         |          |          |          |          |                                                             |                                              |                                                                                                              |                                                                                                                                                                                                                             |                                                                                                                                              |                                                                                                                                                                                                       |         |         |         |        |        |  |
|-------------|-----------------------|---------|---------|----------|----------|----------|----------|-------------------------------------------------------------|----------------------------------------------|--------------------------------------------------------------------------------------------------------------|-----------------------------------------------------------------------------------------------------------------------------------------------------------------------------------------------------------------------------|----------------------------------------------------------------------------------------------------------------------------------------------|-------------------------------------------------------------------------------------------------------------------------------------------------------------------------------------------------------|---------|---------|---------|--------|--------|--|
|             | Derivative            | 107     | 175.128 | 5.88     | Positive | ***      | ***      | ***                                                         | 130.0983<br>101.0893<br>74.0329              | 130.1026<br>101.0961<br>74.0357                                                                              | C <sub>7</sub> H <sub>14</sub> O <sub>2</sub> <sup>+</sup><br>C <sub>6</sub> H <sub>13</sub> O <sup>+</sup><br>C <sub>3</sub> H <sub>6</sub> O <sub>2</sub> <sup>+</sup>                                                    | C(=O)C3(C=C(C(\O)=C(/C=3)\O)\OC(C4(C=C(C(C(O)=C(/C=4)\O)\O))=O)))(C@H)(OC(=O)C5(C=C(C(\O)=C(/C=5)\O)\O))6)OC(C7(C=C(C(C(O)=C(/C=7)\O)\O))=O) | 30(59)38(65)31(12-19)73-43(67)15-3-22(51)34(61)23(52)4-15)41(77-45(69)17-7-26(55)36(63)27(56)8-17)48(74-32)78-47(71)18-9-28(57)37(64)29(58)10-18/h1-12,32,39-41,48-65H,13H2/t32-,39-40+,41-,48+/m1/s1 | 15688a  | 10910a  | 11487a  | 10604a | 13598a |  |
| Fatty acids | Linolenate conjugated | 108     | 447.251 | 15.83    | Negative | ***      | ***      | ***                                                         | 279.2312                                     | 279.2330                                                                                                     | C <sub>18</sub> H <sub>31</sub> O <sub>2</sub> <sup>-</sup>                                                                                                                                                                 | CC\C=C/C\C=C/C\C=C/C\CCCCCCCC(=O)[a glycerolipid]                                                                                            | -                                                                                                                                                                                                     | 11030a  | 1866b   | 1035b   | 324b   | 133b   |  |
|             |                       | 109     | 534.465 | 18.41    | Negative | ***      | ***      | ***                                                         | 255.2312<br>279.2331                         | 255.2330<br>279.2330                                                                                         | C <sub>16</sub> H <sub>31</sub> O <sub>2</sub> <sup>-</sup><br>C <sub>18</sub> H <sub>31</sub> O <sub>2</sub> <sup>-</sup>                                                                                                  |                                                                                                                                              | 7663a                                                                                                                                                                                                 | 6587ab  | 3794bc  | 4935abc | 2494c  |        |  |
|             | Decanoate             |         |         |          |          |          |          |                                                             |                                              |                                                                                                              |                                                                                                                                                                                                                             | CCCCCCCCC(=O)[O-]                                                                                                                            | InChI=1S/C10H20O2/c1-2-3-4-5-6-7-8-9-10(11)12/h2-9H2,1H3,(H,11,12)/p-1                                                                                                                                |         |         |         |        |        |  |
|             | 4-ethyl-octanoate     | 110     | 172.146 | 18.54    | Positive | ***      | 172.1463 | C <sub>10</sub> H <sub>19</sub> O <sub>2</sub>              | 118.1089<br>118.0758<br>116.0783<br>117.0858 | 118.0994<br>118.0994<br>116.0837<br>117.0910                                                                 | C <sub>6</sub> H <sub>14</sub> O <sub>2</sub><br>C <sub>6</sub> H <sub>14</sub> O <sub>2</sub><br>C <sub>6</sub> H <sub>12</sub> O <sub>2</sub><br>C <sub>6</sub> H <sub>12</sub> O <sub>2</sub> <sup>+</sup>               | CCCC(C)CCC([O-])=O                                                                                                                           | InChI=1S/C10H20O2/c1-3-5-6-9(4-2)7-8-10(11)12/h9H,3-8H2,1-2H3,(H,11,12)/p-1                                                                                                                           | 35559a  | 4061b   | 2332b   | 2324b  | 2571b  |  |
|             | 8-methyl-nonanoate    |         |         |          |          |          |          |                                                             |                                              |                                                                                                              |                                                                                                                                                                                                                             | CC(CCCCCC([O-])=O)C                                                                                                                          | InChI=1S/C10H20O2/c1-9(2)7-5-3-4-6-8-10(11)12/h9H,3-8H2,1-2H3,(H,11,12)/p-1                                                                                                                           |         |         |         |        |        |  |
| Derivative  | 111                   | 186.256 | 12.13   | Positive | ***      | ***      | ***      | 173.1578<br>116.0783                                        | 173.1536<br>116.0837                         | C <sub>10</sub> H <sub>21</sub> O <sub>2</sub> <sup>+</sup><br>C <sub>6</sub> H <sub>12</sub> O <sub>2</sub> |                                                                                                                                                                                                                             |                                                                                                                                              | 78563a                                                                                                                                                                                                | 72924ab | 73111ab | 71213ab | 69721b |        |  |
| Flavonoids  | Phlorizin             | 112     | 436.027 | 10.64    | Negative | ***      | 436.1369 | C <sub>21</sub> H <sub>24</sub> O <sub>10</sub>             | 229.0631<br>121.0251                         | 229.0718<br>121.0295                                                                                         | C <sub>10</sub> H <sub>13</sub> O <sub>6</sub> <sup>-</sup><br>C <sub>7</sub> H <sub>5</sub> O <sub>2</sub> <sup>+</sup>                                                                                                    | C(O)[C@@H]3([C@@H](O)[C@H](O)[C@@H](O)[C@H](O)[C@@H](O)[C@H](O)C2(C(C(C(C1(C=C(C(O)=C(C=2)/[O-])O))O3)                                       | InChI=1S/C21H24O10/c2-9-16-18(27)19(28)20(29)21(31-16)30-15-8-12(24)7-14(26)17(15)13(25)6-3-10-1-4-11(23)5-2-10/h1-2,4-5,7-8,16,18-24,26-29H,3,6,9H2/p-1/t16-,18-,19+,20-,21-/m1/s1                   | 49182a  | 13295a  | 44026a  | 26821a | 15101a |  |
|             | Pelargonidin          |         |         |          |          |          |          |                                                             |                                              |                                                                                                              |                                                                                                                                                                                                                             | C3(\C(\C1(=[O+])C2(\C=C(C(C(\C=C1\O-])=2)/[O-]))O))=C/C=C(C(C=3)\O)                                                                          | InChI=1S/C15H10O5/c16-9-3-1-8(2-4-9)15-13(19)7-11-12(18)5-10(17)6-14(11)20-15/h1-7H,(H3-,16,17,18,19)/p-1                                                                                             |         |         |         |        |        |  |
|             | Luteolindin           | 113     | 271.060 | 7.86     | Negative | 271.0612 | 271.0601 | C <sub>15</sub> H <sub>11</sub> O <sub>5</sub> <sup>+</sup> | 271.0600<br>270.0528<br>269.0455<br>120.0575 | 271.0612<br>270.0483<br>269.0418<br>120.0497                                                                 | C <sub>15</sub> H <sub>11</sub> O <sub>5</sub> <sup>-</sup><br>C <sub>15</sub> H <sub>10</sub> O <sub>6</sub><br>C <sub>15</sub> H <sub>9</sub> O <sub>5</sub> <sup>-</sup><br>C <sub>8</sub> H <sub>8</sub> O <sub>6</sub> | C3(/C=C(C(O)=C/C(\C1(=[O+])C2(\C=C(=C1)=C(/C=C(C=2)/O)\O))=3)/O)                                                                             | InChI=1S/C15H10O5/c16-9-6-12(18)10-2-4-14(20-15(10)7-9)8-1-3-11(17)13(19)5-8/h1-7H,(H3-,16,17,18,19)/p+1                                                                                              | 86617a  | 52655a  | 64953a  | 54899a | 29866a |  |
|             | Cyanidin              | 114     | 287.056 | 7.07     | Negative | 287.0539 | 287.0550 | C <sub>15</sub> H <sub>11</sub> O <sub>6</sub> <sup>+</sup> | 287.0572<br>136.0478                         | 287.0561<br>136.0524                                                                                         | C <sub>15</sub> H <sub>11</sub> O <sub>6</sub> <sup>-</sup><br>C <sub>8</sub> H <sub>8</sub> O <sub>2</sub>                                                                                                                 | C3(\C(\C1(=[O+])C2(\C=C(C(C(\C=C                                                                                                             | InChI=1S/C15H10O6/c16-8-4-11(18)9-6-                                                                                                                                                                  | 16141a  | 4134a   | 4556a   | 4681a  | 4260a  |  |

|                        |                                                           |     |         |       |          |          |          |                       |                                                                      |                                                                      |                                                                                                                         |                                                                                                                                                                                                                                                   |                                                                                                                                                                                                                                                                                               |         |         |         |          |         |  |
|------------------------|-----------------------------------------------------------|-----|---------|-------|----------|----------|----------|-----------------------|----------------------------------------------------------------------|----------------------------------------------------------------------|-------------------------------------------------------------------------------------------------------------------------|---------------------------------------------------------------------------------------------------------------------------------------------------------------------------------------------------------------------------------------------------|-----------------------------------------------------------------------------------------------------------------------------------------------------------------------------------------------------------------------------------------------------------------------------------------------|---------|---------|---------|----------|---------|--|
|                        |                                                           |     |         |       |          |          |          |                       |                                                                      |                                                                      |                                                                                                                         | $1\backslash\text{O}-\text{]}=2)/[\text{O}-\text{]}\backslash\text{O})\text{)}=C/C(/O)=C(\backslash C=3)/O)$                                                                                                                                      | 13(20)15(21-14(9)5-8)7-1-2-10(17)12(19)3-7/h1-6H,(H4-,16,17,18,19,20)/p-1                                                                                                                                                                                                                     |         |         |         |          |         |  |
|                        | Peonidin                                                  | 115 | 301.071 | 8.11  | Negative | 301.0753 | 301.0707 | $C_{16}H_{13}O_6^+$   | 301.0768<br>286.0441<br>150.0681<br>177.0168<br>161.0253<br>137.0584 | 301.0718<br>286.0488<br>150.0692<br>177.0193<br>161.0244<br>137.0608 | $C_{16}H_{13}O_6^-$<br>$C_{15}H_{10}O_6^{2-}$<br>$C_9H_{10}O_2^{2-}$<br>$C_9H_5O_4^-$<br>$C_9H_5O_3^-$<br>$C_8H_9O_2^-$ | $\text{COC}1(/C=C(\backslash C=C/C(/O)=1)/C2(C(/O-])=C^{\backslash}C3(\backslash C(\backslash O-])=C/C(/O)=C(\backslash O+]=2)=3)))$                                                                                                              | InChI=1S/C16H12O6/c1-21-15-4-8(2-3-11(15)18)16-13(20)7-10-12(19)5-9(17)6-14(10)22-16/h2-7H,1H3,(H3-,17,18,19,20)/p-1                                                                                                                                                                          | 41085a  | 2177a   | 46029a  | 9172a    | 50416a  |  |
|                        | 6,2'-dimethoxy-4',5'-methylenedioxy-isoflavone derivative | 116 | 325.090 | 3.38  | Negative | 325.086  | 325.072  | $C_{18}H_{13}O_6^-$   | 179.0370<br>135.0451                                                 | 179.0350<br>135.0452                                                 | $C_9H_7O_4^-$<br>$C_8H_7O_2^-$                                                                                          | $\text{COC}4(/C=C1(C(/OC O1)=C^{\backslash}C(\backslash C2(\backslash C3(\backslash C=C(C(/O)=C^{\backslash}C(\backslash O^{\backslash}C=2)=3)/OC)=O)=4))$                                                                                        | InChI=1S/C18H14O7/c1-21-13-6-17-16(24-8-25-17)3-9(13)11-7-23-14-5-12(19)15(22-2)4-10(14)18(11)20/h3-7,19H,8H2,1-2H3                                                                                                                                                                           | 14401a  | 7310a   | 14626a  | 5704a    | 10476a  |  |
| Organosulfur compounds | 2-mercaptobenzothiazole                                   | 117 | 165.979 | 7.52  | Negative | ***      | 166.9863 | $C_7H_5NS_2$          | 165.9788<br>134.0074<br>102.0410<br>31.9732                          | 165.9791<br>134.0070<br>102.0383<br>31.9758                          | $C_7H_4NS_2^-$<br>$C_7H_4NS^-$<br>$C_4H_8NS^-$<br>$S^{2-}$                                                              | $C1(=NC2(/C=C^{\backslash}C=C/C(/S1)=2))S$                                                                                                                                                                                                        | InChI=1S/C7H5NS2/c9-7-8-5-3-1-2-4-6(5)10-7/h1-4H,(H,8,9)                                                                                                                                                                                                                                      | 246143a | 134289b | 126353b | 150561ab | 115219b |  |
|                        | Derivative                                                | 118 | 166.980 | 7.25  | Negative | ***      | 166.9874 | $C_7H_5NS_2^{2-}$     | 165.9788<br>134.0074<br>32.9820                                      | 165.9791<br>134.0070<br>32.9820                                      | $C_7H_4NS_2^-$<br>$C_7H_4NS^-$<br>$HS^-$                                                                                |                                                                                                                                                                                                                                                   |                                                                                                                                                                                                                                                                                               | 8425a   | 3808b   | 2643b   | 3378b    | 2702b   |  |
|                        |                                                           | 119 | 167.975 | 7.51  | Negative | ***      | 166.9947 | $C_7H_6NS_2^-$        |                                                                      |                                                                      |                                                                                                                         |                                                                                                                                                                                                                                                   |                                                                                                                                                                                                                                                                                               | 23223a  | 10200b  | 10736b  | 9997b    | 8293b   |  |
| Terpenoids             | 8,8-dihydroxy-trans-neoxanthin                            | 120 | 636.407 | 17.67 | Positive | ***      | 634.4233 | $C_{40}H_{58}O_6$     | 242.2534<br>147.13671<br>41.0935                                     | 242.2599<br>147.1380<br>141.0910                                     | $C_{16}H_{34}O_2^+$<br>$C_8H_{19}O_2^+$<br>$C_8H_{13}O_2^+$                                                             | $CC(/C=C/C=C(C)/C=C=C1([C@])O(C)C[C@@H](O)CC(C)(C)1)=C^{\backslash}C=C^{\backslash}C=C(C)(C)C=C^{\backslash}C=C(C)\backslash C(O)O[C@]23(C(C)(C)C[C@H](O)C[C@](C)(O2)3)$                                                                          | InChI=1S/C40H58O6/c1-28(17-13-18-30(3)21-22-34-35(5,6)23-32(4)25-37(34,9)43)15-11-12-16-29(2)19-14-20-31(4)39(44,45)27-40-36(7,8)24-33(42)26-38(40,10)46-40/h11-21,32-33,41-45H,23-27H2,1-10H3/b12-11+,17-13+,19-14+,28-15+,29-16+,30-18+,31-20+/t22?,32-,33-,37+,38+,40-/m0/s1               | 11373a  | 12800a  | 6314a   | 6729a    | 4458a   |  |
|                        |                                                           | 121 | 635.450 | 17.62 | Positive | ***      | 634.4233 | $C_{40}H_{58}O_6$     |                                                                      |                                                                      |                                                                                                                         |                                                                                                                                                                                                                                                   |                                                                                                                                                                                                                                                                                               | 9143a   | 7235ab  | 4692ab  | 2916b    | 2844b   |  |
|                        | Oat triterpenoid saponin                                  | 122 | 1093.18 | 8.85  | Positive | ***      | 1093.546 | $C_{55}H_{83}NO_{21}$ | 1023.509<br>1007.475<br>977.4956<br>116.1053                         | 1023.516<br>1007.485<br>977.4952<br>116.1070                         | $C_{52}H_{79}O_{20}^+$<br>$C_{51}H_{75}O_{20}^+$<br>$C_{47}H_{71}O_{21}^+$<br>$C_6H_{14}NO^+$                           | $C[C@]2(C=O)([C@@H](OC(=O)C1(\backslash C\backslash NC)=C/C=C=1))C[C@@]4(C)([C@@H](C2)[C@@]35(O[C@]H)3[C@H]6([C@](C)([C@](C)(C)[C@H](O)4)5)C[C@]H)6%10([C@@]([C]6CC[C@H](O[C@@]H)9OC[C@H](O[C@@]H)7(O[C@H](CO)[C@@]H)(O)[C@H](O)[C@@]H)(O7))C@H]$ | InChI=1S/C55H83NO21/c1-49(23-59)17-32-51(3,19-36(49)74-45(69)25-10-8-9-11-26(25)56-7)33(61)18-54(6)53(5)15-12-30-50(2,31(53)16-35-55(32,54)77-35)14-13-34(52(30,4)24-60)75-48-44(76-47-43(68)41(66)38(63)28(21-58)72-47)39(64)29(22-70-48)73-46-42(67)40(65)37(62)27(20-57)71-46/h8-11,23,27- | 13127a  | 4264b   | 1671b   | 539b     | 481b    |  |

|                                                 |                                             |         |         |          |          |          |                                                  |                                                                |                                                         |                                                                                                                                                                                                                                                                                                                 |                                                                                                                                                                                                                                                              |                                                                                                                                                                                                                                      |                                                                                                                                                                          |         |         |         |         |        |  |
|-------------------------------------------------|---------------------------------------------|---------|---------|----------|----------|----------|--------------------------------------------------|----------------------------------------------------------------|---------------------------------------------------------|-----------------------------------------------------------------------------------------------------------------------------------------------------------------------------------------------------------------------------------------------------------------------------------------------------------------|--------------------------------------------------------------------------------------------------------------------------------------------------------------------------------------------------------------------------------------------------------------|--------------------------------------------------------------------------------------------------------------------------------------------------------------------------------------------------------------------------------------|--------------------------------------------------------------------------------------------------------------------------------------------------------------------------|---------|---------|---------|---------|--------|--|
|                                                 |                                             |         |         |          |          |          |                                                  |                                                                |                                                         |                                                                                                                                                                                                                                                                                                                 | (O)[C@@H](O)[C@@H]8(O)[C@H](CO)[C@@H](O)[C@H](O)[C@@H](O)8)9)))[C@](CO)(C%10))))                                                                                                                                                                             | 44,46-48,56-58,60-68H,12-22,24H2,1-7H3/t27-,28-,29+,30-,31-,32-,33+,34+,35-,36+,37-,38-,39+,40+,41+,42-,43-,44-,46+,47+,48+,49+,50+,51+,52+,53-,54+,55-/m1/s1                                                                        |                                                                                                                                                                          |         |         |         |         |        |  |
| Phospholipids                                   | 1-deoxy-L-glycero-tetrol-4-phosphate        | 123     | 184.023 | 7.72     | Positive | ***      | 184.0137                                         | C <sub>4</sub> H <sub>9</sub> O <sub>6</sub> P                 | 184.0117<br>167.0121<br>108.0284                        | 184.0126<br>167.0104<br>108.0329                                                                                                                                                                                                                                                                                | C <sub>4</sub> H <sub>9</sub> O <sub>6</sub> P <sup>2+</sup><br>C <sub>4</sub> H <sub>8</sub> O <sub>5</sub> P <sup>+</sup><br>C <sub>3</sub> H <sub>7</sub> O <sub>4</sub> P <sup>+</sup>                                                                   | CC(=O)[C@H](O)COP(=O)([O-])[O-]                                                                                                                                                                                                      | InChI=1S/C4H9O6P/c1-3(5)4(6)2-10-11(7,8)9/h4,6H,2H2,1H3,(H2,7,8,9)/p-2/t4-/m1/s1                                                                                         | 25359a  | 18018ab | 16001ab | 17532ab | 10623b |  |
|                                                 | Phosphoenol-2-oxobutyrate                   |         |         |          |          |          |                                                  |                                                                |                                                         |                                                                                                                                                                                                                                                                                                                 |                                                                                                                                                                                                                                                              | CCC(OP([O-])([O-])=O)C([O-])=O                                                                                                                                                                                                       | InChI=1S/C4H9O6P/c1-2-3(4(5)6)10-11(7,8)9/h3H,2H2,1H3,(H,5,6)(H2,7,8,9)/p-3                                                                                              | 46113a  | 26470a  | 46907a  | 32230a  | 22677a |  |
|                                                 | Derivative                                  | 124     | 186.254 | 7.67     | Positive | ***      | ***                                              | ***                                                            |                                                         |                                                                                                                                                                                                                                                                                                                 |                                                                                                                                                                                                                                                              |                                                                                                                                                                                                                                      |                                                                                                                                                                          |         |         |         |         |        |  |
|                                                 | 1-stearoyl-sn-glycero-3-phosphocholine      | 125     | 525.352 | 6.42     | Positive | ***      | 524.3711                                         | C <sub>26</sub> H <sub>55</sub> NO <sub>7</sub> P <sup>+</sup> | 273.1273<br>133.1223<br>111.0147<br>272.0947            | 273.1330<br>133.1177<br>111.0206<br>272.0894                                                                                                                                                                                                                                                                    | C <sub>9</sub> H <sub>24</sub> NO <sub>6</sub> P <sup>2+</sup><br>C <sub>3</sub> H <sub>17</sub> O <sub>2</sub> <sup>+</sup><br>C <sub>2</sub> H <sub>5</sub> O <sub>3</sub> P <sup>+</sup><br>C <sub>8</sub> H <sub>19</sub> NO <sub>7</sub> P <sup>+</sup> | CCCCCCCCCCCCCCCCCOC[C@H](O)COP(OCC[N+](C)(C)C(=O)[O-])=O                                                                                                                                                                             | InChI=1S/C26H54NO7P/c1-5-6-7-8-9-10-11-12-13-14-15-16-17-18-19-20-26(29)32-23-25(28)24-34-35(30,31)33-22-21-27(2,3)4/h25,28H,5-24H2,1-4H3/t25-/m1/s1                     | 7292a   | 3062a   | 6199a   | 4892a   | 4975a  |  |
|                                                 | 2-C22:0-α,ω-dicarbonyllysophosphatidic acid | 126     | 524.319 | 12.78    | Positive | ***      | 524.3114                                         | C <sub>25</sub> H <sub>49</sub> O <sub>9</sub> P <sup>+</sup>  | 209.0866<br>169.9964<br>171.0002                        | 209.0937<br>169.9980<br>171.0053                                                                                                                                                                                                                                                                                | C <sub>8</sub> H <sub>18</sub> O <sub>4</sub> P <sup>+</sup><br>C <sub>3</sub> H <sub>7</sub> O <sub>6</sub> P<br>C <sub>3</sub> H <sub>8</sub> O <sub>6</sub> P <sup>+</sup>                                                                                | C(OP([O-])(=O)[O-])[C@H](OC(=O)C)CCCCCCCCC(=O)CO                                                                                                                                                                                     | InChI=1S/C25H49O9P/c26-21-23(22-33-35(30,31)32)34-25(29)20-18-16-14-12-10-8-6-4-2-1-3-5-7-9-11-13-15-17-19-24(27)28/h23,26H,1-22H2,(H,27,28)(H2,30,31,32)/p-3/t23-/m1/s1 | 7147a   | 7053a   | 5935ab  | 3141bc  | 1841c  |  |
| Derivatives of phospholipids                    |                                             | 127     | 759.702 | 17.91    | Positive | ***      | ***                                              | ***                                                            | 184.0966                                                | 184.1000                                                                                                                                                                                                                                                                                                        | C <sub>5</sub> H <sub>17</sub> N <sub>2</sub> O <sub>3</sub> P <sup>2+</sup>                                                                                                                                                                                 |                                                                                                                                                                                                                                      |                                                                                                                                                                          | 17083a  | 5925b   | 2964bc  | 315c    | 276c   |  |
|                                                 |                                             | 128     | 758.686 | 18.21    | Positive | ***      | ***                                              | ***                                                            | 125.0218                                                | 125.0231                                                                                                                                                                                                                                                                                                        | C <sub>2</sub> H <sub>8</sub> NO <sub>3</sub> P <sup>2+</sup>                                                                                                                                                                                                |                                                                                                                                                                                                                                      |                                                                                                                                                                          | 54429a  | 23702b  | 21322b  | 2960b   | 873b   |  |
|                                                 |                                             | 129     | 438.107 | 10.63    | Positive | ***      | ***                                              | ***                                                            | 272.0947                                                | 272.0894                                                                                                                                                                                                                                                                                                        | C <sub>8</sub> H <sub>19</sub> NO <sub>7</sub> P <sup>+</sup>                                                                                                                                                                                                | -                                                                                                                                                                                                                                    | -                                                                                                                                                                        | 17177a  | 5958a   | 19187a  | 11229a  | 7375a  |  |
|                                                 |                                             | 130     | 435.324 | 15.29    | Positive | ***      | ***                                              | ***                                                            | 98.0179                                                 | 98.0122                                                                                                                                                                                                                                                                                                         | CH <sub>7</sub> O <sub>3</sub> P <sup>2+</sup>                                                                                                                                                                                                               |                                                                                                                                                                                                                                      |                                                                                                                                                                          | 14252a  | 12649a  | 6757a   | 4880a   | 3020a  |  |
|                                                 |                                             | 131     | 539.431 | 13.33    | Positive | ***      | ***                                              | ***                                                            | 125.0303                                                | 125.0362                                                                                                                                                                                                                                                                                                        | C <sub>3</sub> H <sub>10</sub> O <sub>3</sub> P <sup>+</sup>                                                                                                                                                                                                 |                                                                                                                                                                                                                                      |                                                                                                                                                                          | 25166a  | 9032b   | 9223b   | 6800b   | 7769b  |  |
| (trans-, trans-)dioctadec-8-enoyl phosphatidate | 132                                         | 701.505 | 17.96   | Positive | ***      | 700.5043 | C <sub>39</sub> H <sub>73</sub> O <sub>8</sub> P | 369.2589<br>313.1800<br>181.0579<br>125.0218<br>98.0179        | 369.2636<br>313.1775<br>181.0624<br>125.0231<br>98.0122 | C <sub>21</sub> H <sub>37</sub> O <sub>5</sub> <sup>+</sup><br>C <sub>13</sub> H <sub>30</sub> O <sub>6</sub> P <sup>+</sup><br>C <sub>6</sub> H <sub>14</sub> O <sub>4</sub> P <sup>+</sup><br>C <sub>2</sub> H <sub>8</sub> NO <sub>3</sub> P <sup>2+</sup><br>CH <sub>7</sub> O <sub>3</sub> P <sup>2+</sup> | CCCCCCCCC/C=C/CCCCC(=O)OC[C@H](OC(CCCC/C=C/CCCCC(=O)COP([O-])(=O)[O-]))(=O)[O-]                                                                                                                                                                              | InChI=1S/C39H73O8P/c1-3-5-7-9-11-13-15-17-19-21-23-25-27-29-31-33-38(40)45-35-37(36-46-48(42,43)44)47-39(41)34-32-30-28-26-24-22-20-18-16-14-12-10-8-6-4-2/h19-22,37H,3-18,23-36H2,1-2H3,(H2,42,43,44)/p-2/b21-19+,22-20+/t37-/m1/s1 | 76804a                                                                                                                                                                   | 117402a | 20278b  | 1115b   | 725b    |        |  |
| 1-18:0-2-                                       |                                             |         |         |          |          |          |                                                  |                                                                |                                                         |                                                                                                                                                                                                                                                                                                                 | CCCCCCCCCCCCCCCCCOC[C@H](OC(=O)CCCC                                                                                                                                                                                                                          | InChI=1S/C39H73O8P/c1-3-5-7-9-11-13-15-17-19-21-23-25-27-29-31-                                                                                                                                                                      |                                                                                                                                                                          |         |         |         |         |        |  |

|  |                                    |  |  |  |  |  |  |  |  |  |  |  |                                                                                      |                                                                                                                                                                                                                                             |  |  |  |  |  |
|--|------------------------------------|--|--|--|--|--|--|--|--|--|--|--|--------------------------------------------------------------------------------------|---------------------------------------------------------------------------------------------------------------------------------------------------------------------------------------------------------------------------------------------|--|--|--|--|--|
|  | 18:2-phosphatide                   |  |  |  |  |  |  |  |  |  |  |  | <chem>CC\C=C/C\C=C/C/CCCCCOP([O-])(=O)[O-]=O</chem>                                  | <p>33-38(40)45-35-37(36-46-48(42,43)44)47-39(41)34-32-30-28-26-24-22-20-18-16-14-12-10-8-6-4-2/h12,14,18,20,37H,3-11,13,15-17,19,21-36H2,1-2H3,(H2,42,43,44)/p-2/b14-12-,20-18-/t37-/m1/s1</p>                                              |  |  |  |  |  |
|  | 1,2-bis-icis-vaccenoyl-phosphatide |  |  |  |  |  |  |  |  |  |  |  | <chem>CCCCC\C=C/C/CCCCCOC[C@@H](OC(=O)CCCCC\C=C/C/CCCCCOP([O-])(=O)[O-])=O</chem>    | <p>InChI=1S/C39H73O8P/c1-3-5-7-9-11-13-15-17-19-21-23-25-27-29-31-33-38(40)45-35-37(36-46-48(42,43)44)47-39(41)34-32-30-28-26-24-22-20-18-16-14-12-10-8-6-4-2/h13-16,37H,3-12,17-36H2,1-2H3,(H2,42,43,44)/p-2/b15-13-,16-14-/t37-/m1/s1</p> |  |  |  |  |  |
|  | Bisoleoyl phosphate                |  |  |  |  |  |  |  |  |  |  |  | <chem>CCCCCCCC\C=C/C/CCCCCOC[C@@H](OC(=O)CCCCC\C=C/C/CCCCCOP([O-])(=O)[O-])=O</chem> | <p>InChI=1S/C39H73O8P/c1-3-5-7-9-11-13-15-17-19-21-23-25-27-29-31-33-38(40)45-35-37(36-46-48(42,43)44)47-39(41)34-32-30-28-26-24-22-20-18-16-14-12-10-8-6-4-2/h17-20,37H,3-16,21-36H2,1-2H3,(H2,42,43,44)/p-2/b19-17-,20-18-/t37-/m1/s1</p> |  |  |  |  |  |
